1 **Arabidopsis species deploy distinct strategies to cope with**  
2 **drought stress**

3 M. Bouzid<sup>1</sup>, F. He<sup>1</sup>, G. Schmitz<sup>1</sup>, R.E. Häusler<sup>1</sup>, A.P.M.  
4 Weber<sup>2</sup>, T. Mettler-Altmann<sup>2</sup>, J. de Meaux<sup>1</sup>.

5

6 <sup>1</sup>Institute of Botany, Biozentrum, University of Cologne,  
7 Zülpicher Str. 47b, 50674 Cologne, Germany; <sup>2</sup>Institut of plant  
8 biochemistry, Heinrich-Heine-Universität, Universitätsstr. 1,  
9 40225 Düsseldorf, Germany.

10

11 Author for correspondence:

12 Juliette de Meaux

13 Tel: +492214708213

14 E-mail: [jdemeaux@uni-koeln.de](mailto:jdemeaux@uni-koeln.de)

15

16

17

18

19

20

21

22

23

24

25

26

## 27 **Summary**

- 28 • Little is known about how the physiological response to  
29 water deprivation differs among closely related plant  
30 species with different ecologies. In particular, how the  
31 relatives of the model species *Arabidopsis thaliana* react to  
32 drought stress is unknown.
- 33 • We conducted a dry-down experiment that mimics a period  
34 of missing precipitation and monitors plant reactions to the  
35 progressive decrease in soil water content (SWC) in  
36 *Arabidopsis thaliana*, and its close relatives *A. lyrata* and *A.*  
37 *halleri* at phenotypic and transcriptomic levels.
- 38 • The three species differed significantly in their reaction to  
39 decreasing soil water content. *A. thaliana* withstood low  
40 SWC but did not survive wilting. *A. lyrata* and *A. halleri*  
41 wilted at higher SWC but differed in water consumption  
42 rate and tolerance levels. Transcriptome data collected just  
43 before wilting and after recovery corroborated the  
44 phenotypic analysis, with *A. halleri* and *A. lyrata* showing a  
45 stronger activation of stress- and recovery-related genes,  
46 respectively.
- 47 • We conclude that these *Arabidopsis* species have evolved  
48 distinct strategies to face drought stress. *A. lyrata* employed  
49 both avoidance and tolerance mechanisms, whereas *A.*  
50 *thaliana* showed stronger avoidance reactions but no  
51 tolerance. *A. halleri* is the least able to protect itself from  
52 the stress imposed by drought.

53 **Key words:** *Arabidopsis*, avoidance and tolerance  
54 strategies, drought stress response, ecological speciation, plant  
55 wilting.

## 56 **Introduction**

57 All physiological and cellular plant aspects depend on water, so  
58 limitation in its supply is a major abiotic stress restricting plant  
59 growth and crop yield (Stebbins, 1952; Boyer, 1982; Bohnert *et*  
60 *al.*, 1995; Bray, 1997, Lambers *et al.*, 1998; Bray *et al.*, 2000).  
61 Water limitation is also a crucial determinant of the  
62 distribution, abundance and diversity of plant species  
63 (Hoffmann & Sgró, 2011).

64 All spermatophytes possess the molecular toolkit to tolerate  
65 intense cellular dehydration in seeds (Golovina *et al.*, 1997;  
66 Kermode, 1997; Wehmeyer & Vierling, 2000). Adult plants  
67 can draw from this toolbox to tolerate a certain degree of  
68 dehydration in vegetative organs (Ludlow, 1989; Shinozaki &  
69 Yamaguchi-Shinozaki, 2007). This tolerance strategy relies on  
70 osmotic adjustment via the accumulation of an array of solutes,  
71 such as amino-acids, sugars, or dehydrins (Close, 1996). The  
72 expression of heat shock proteins, chaperones, or late  
73 embryogenesis abundant (LEA) proteins can further help to  
74 protect the cell against damages imposed by low internal water  
75 potential (Ingram & Bartels, 1996; Reddy *et al.*, 2004, Yue *et*  
76 *al.*, 2006; Szabados, 2010).

77 However, plants have evolved additional strategies to handle  
78 drought stress: escape and avoidance (Ludlow, 1989; Fukai &  
79 Cooper, 1995; Verslues & Juenger, 2011; Fang & Xiong,  
80 2015). The escape strategy is based on the adjustment of  
81 developmental transitions to elude direct exposure to drought.  
82 With an increase in the duration of seed dormancy or a  
83 shortening of the life cycle, the plant is simply not facing dry  
84 seasons (Fox, 1990; Bewley, 1997; Tonsor *et al.*, 2005; Franks  
85 *et al.*, 2007; Kronholm *et al.*, 2012; Lovell *et al.*, 2013). The  
86 avoidance strategy, instead, seeks to maintain water levels  
87 within tissues through a reduction of water loss and the  
88 enhancement of water uptake, so that the plant bypasses the

89 damaging effects of drought (Levitt, 1980; Ludlow, 1989; Price  
90 *et al.*, 2002; Farooq *et al.*, 2009; Munemasa *et al.*, 2015).

91 The relative importance of strategies to cope with drought  
92 stress is expected to be intimately linked to the life history and  
93 ecology of species. Indeed, tolerance, avoidance, and escape  
94 strategies are not independent in evolution (Grime, 1977).  
95 Trade-offs between growth and tolerance can constrain their  
96 optimization (McKay *et al.*, 2003, Steven, 2011). Annual  
97 species prioritize the escape strategy, which in turn can release  
98 the need for tolerance mechanisms (Kooyers, 2015). Perennial  
99 species, by contrast, must maintain tolerance mechanisms to  
100 increase long-term survival.

101 Dehydration triggers dramatic responses in plant cells, as  
102 indicated by the fast and extensive changes in gene transcript  
103 levels (Shinozaki & Yamaguchi Shinozaki, 2000; Iuchi *et al.*,  
104 2001; Seki *et al.*, 2001; Shinozaki & Yamaguchi, 2007; Matsui  
105 *et al.*, 2008; Harb *et al.*, 2010). Part of this response is  
106 regulated by the key drought-stress hormone abscisic acid  
107 (ABA), but ABA-independent transcriptional regulation also  
108 plays an important role (Iuchi *et al.*, 2001; Seki *et al.*, 2001;  
109 Sakuma *et al.*, 2006; Yoshida *et al.*, 2014; Urano *et al.*, 2017).  
110 The complex architecture of gene regulatory responses to stress  
111 is believed to contribute to restricting the reactions at cell and  
112 whole-plant levels when the internal water potential drops  
113 (Bray, 1997; Szabados, 2010; Osakabe *et al.*, 2014). By  
114 articulating growth and stress responses, transcriptomic  
115 changes take part in both the deployment of avoidance  
116 strategies and the promotion of recovery from stress, yet they  
117 also reveal the degree of stress sensed by the organisms.  
118 Distantly related annual species, such as wheat and  
119 *Arabidopsis*, show common patterns of stress responses. Much  
120 less is known about how responses to stress are reshaped in

121 closely related species with strongly divergent ecologies and  
122 life-histories.

123 Comparison of *A. thaliana* to its close relatives can help  
124 disentangle the molecular changes contributing to tolerance and  
125 avoidance mechanisms, because different species in the genus  
126 have evolved distinct ecologies with contrasting demands on  
127 tolerance and avoidance (Clauss & Koch, 2006). The model  
128 species *A. thaliana* shows a broad distribution range from north  
129 of Scandinavia to Africa (Hoffmann, 2005, Durvasula *et al.*,  
130 2017). Its response to severe or mild drought stress has been  
131 described in detail (Seki *et al.*, 2002; Bray, 2004; Verslues &  
132 Juenger, 2011; Des Marais *et al.*, 2012; Juenger, 2013;  
133 Bechtold *et al.*, 2015; Lovell *et al.*, 2015). Several studies point  
134 to the adaptive relevance of its variation (Kesari *et al.*, 2012;  
135 Exposito-Alonso *et al.*, 2017). This annual species can also rely  
136 on modifications of its life cycle to adjust the timing of escape  
137 and/or avoidance strategies to drought threats (McKay *et al.*,  
138 2003; Kronholm *et al.*, 2012; Wolfe & Tonsor, 2014). The two  
139 sister species *Arabidopsis lyrata* and *A. halleri*, by contrast, are  
140 less likely to rely on escape strategies because year-to-year  
141 survival is of major importance for these perennials. *A. lyrata* is  
142 probably the most exposed of the two to natural selection by  
143 drought due to its preference for low competitive communities  
144 in soils that do not retain water (Clauss & Koch, 2006;  
145 Ellenberg & Leuschner, 2010; Sletvold & Agren, 2012). *A.*  
146 *halleri*, instead, must grow to out-compete other species in  
147 crowded habitats (Clauss & Koch, 2006; Ellenberg &  
148 Leuschner, 2010; Stein *et al.*, 2017). Its specific ability to  
149 accumulate heavy metals enhances its defenses against  
150 herbivores but sets strong constitutive demands on detoxifying  
151 systems which are important for reestablishing homeostasis  
152 after stress (Mittler, 2002; Becher *et al.*, 2004; Krämer &  
153 Clemens, 2006; Stolpe *et al.*, 2016). The contrasted ecologies

154 of these three species thus predict major consequences on their  
155 strategies to face up with the challenges imposed by water  
156 limitations.

157 To test this prediction, we set up an experiment to infer the  
158 response strategy to drought of 10-15 accessions representative  
159 of the three species *A. thaliana*, *A. halleri* and *A. lyrata*. For  
160 this, we measured plant drought reaction at both phenotypic  
161 and transcriptomic levels in a dry-down experiment that mimics  
162 the progression of water depletion in natural conditions. Our  
163 data showed that species deploy different avoidance and  
164 tolerance strategies in response to decreasing levels of SWC.

## 165 **Materials and Methods**

### 166 **Plant material and growth conditions**

167 16 to 22 and 12 to 17 central European *A. lyrata* and *A. halleri*  
168 accessions, respectively, were included in the dry down  
169 experiments. The accessions were taken from populations  
170 representative of the diversity described in these species (Table  
171 S1, Pauwels *et al.*, 2005; Ross-Ibarra *et al.*, 2008; Novikova *et*  
172 *al.*, 2016; Stein *et al.*, 2017). They were compared to 16 *A.*  
173 *thaliana* accessions from Spain with European genomic  
174 background (The 1001 Genomes Consortium 2016). This  
175 sample was chosen because i) the populations are among the  
176 most drought resistant in *A. thaliana* (Exposito-Alonso *et al.*,  
177 2017) and ii) are late flowering (Arapheno database, FT16,  
178 DOI: [10.21958/phenotype:262](https://doi.org/10.21958/phenotype:262)) so that the stress exposure  
179 cannot be circumvented by life cycle termination. For each  
180 accession, five replicates (vegetatively propagated clones for  
181 the self-incompatible species, single-descent seeds for *A.*  
182 *thaliana*) were distributed in 5 randomized complete blocks.

183 Plants were grown in 7x7x8 cm pots filled with 150 g of a well-  
184 homogenized mixture of VM soil (60 to 70% of peat and 30 to

185 40% of clay), perlite and seramis (clay granules) in a CLF  
186 controlled growth chamber (Perkin Elmer, USA). Growth  
187 conditions were 10 h (20°C): 14 h (16°C), light: dark, at a  
188 photon flux density (PFD) of 100  $\mu\text{mol m}^{-2} \text{s}^{-1}$  supplemented  
189 with 10 min of dark-red light at the end of the day. Relative  
190 humidity was set to 60%.

## 191 **Dry-down experimental design**

192 Plants were grown for five weeks in the greenhouse, re-potted  
193 in weighed pots filled with the initial soil mixture, and  
194 transferred to the growth chamber. Soil moisture was quantified  
195 every day ( $X_t$ ) by monitoring pot mass with a precision balance  
196 with an accuracy of 0.01 g. To calculate the soil moisture,  
197 several pots were fully dried down in an oven to estimate the  
198 weight of dry soil ( $X_0$ ) in the initial soil mixture and  
199 subsequently saturated with water to determine the weight of  
200 100% wet soil ( $X_f$ ). The percentage of soil moisture was  
201 calculated as  $[(X_t - X_0) / (X_f - X_0)] \times 100$ . For acclimation, plants  
202 were grown for two weeks in pots with 60% soil moisture.  
203 After acclimation, plants were not watered until showing first  
204 symptoms of wilting. Plants were re-watered two days after  
205 wilting. One to two weeks later survival and symptoms of  
206 damage were scored.

207 Three independent biological experiments were performed,  
208 with slight differences in the number of replicates and/or  
209 accessions (for details see Table S1-S3). The two first  
210 experiments were used for phenotypic characterization and the  
211 third for sampling of leaf material for RNA extraction. In the  
212 experiment, plants were re-watered on the day of wilting to  
213 allow collecting leaf material after recovery.

## 214 **Phenotypic trait measurements**

215 ***Phenotypic differences between species in well-watered***  
216 ***conditions***

217 Three phenotypes were measured in *A. halleri* and *A. lyrata* in  
218 glasshouse-grown plants under well-watered conditions:  
219 stomatal density, stomata length, and carbon isotope  
220 discrimination ( $\delta^{13}\text{C}$ ). Stomatal density and length were  
221 quantified in fully-developed leaves of five replicates of nine  
222 accessions per species following protocol described by Paccard  
223 *et al.*, (2014).  $\delta^{13}\text{C}$  in one fully developed leaf was quantified  
224 for 4 replicates of the same nine accessions of each species  
225 according to the method used by Gowik *et al.*, (2011).

226 ***Phenotypic variation in response to soil dry-down***

227 Eight phenotypes were measured during the dry-down  
228 experiment. Rosette leaf area was quantified on day zero of the  
229 dry-down experiment, using ImageJ to separate green pixels  
230 from the background images and RosetteTracker (Vylder *et al.*,  
231 2012) to convert total green pixel into  $\text{mm}^2$ . The day when  
232 leaves lost their turgidity was scored as wilting day. Soil  
233 moisture was measured every day until the day of wilting. The  
234 rate of soil water loss was calculated for each pot over the first  
235 seven days after water withdrawal. Leaf lamina thickness was  
236 measured on one ink-marked medium-size leaf every second  
237 day using a digital ruler (HOLEX, Hoffmann Group,  
238 Knoxville, USA) with an accuracy of 0.03 mm. Efficiency of  
239 the photosynthetic light reaction was measured by Pulse-  
240 Amplitude-Modulation (PAM) fluorometry (Schreiber *et al.*,  
241 1986) using the IMAGING-PAM-Series (M-Series-Maxi  
242 version, Heinz Walz GmbH, Effeltrich, Germany). In order to  
243 gain information on the intactness of photosystem II (PSII) and  
244 hence its potential photosynthetic capacity, the maximum  
245 quantum efficiency of open PSII reaction centers ( $F_v : F_m$ , i.e.  
246 the ratio of variable to maximum Chla fluorescence) was



247 determined (Genty *et al.*, 1989; Maxwell & Johnson, 2000).  
248 Before the application of a saturating light flash (duration 0.8  
249 s), plants were dark-adapted for 30 min. Intact and non-stressed  
250 plants usually show an  $F_v : F_m$  ratio of around 0.8. Plants that  
251 developed new leaves within two weeks after re-watering were  
252 scored as having survived and the damage caused by wilting  
253 was quantified on a damage severity scale from one to five,  
254 reflecting the percentage of damaged leaf area, leaf color and  
255 leaf strength. The number of days of tolerated wilting was  
256 scored on plants that survived the first dry-down experiment.  
257 For this, plants were dried down a second time until wilting and  
258 re-watered after three, four, five, or six days of wilting.  
259 Photosynthetic activity and duration of tolerated wilting were  
260 measured in the first experiment, whereas rosette area and leaf  
261 thickness were measured only in the second experiment (Table  
262 S2).

## 263 **Statistical analysis of phenotypic variation**

264 All plots were created using the *CRAN-package ggplot2*  
265 (Wickham, 2009). We used generalized linear models and  
266 multiple comparison tests using the *Simultaneous Inference in*  
267 *General Parametric Models* package named *multcomp* and  
268 Tukey's Honest Significant Difference test (Tukey HSD). For  
269 each phenotype, we ran several models. As we did not detect  
270 any block effect for the different measured traits, we removed it  
271 from our models. Following are the different tested models, and  
272 later in the results part, we will mention which was the best  
273 model:

274 (M1) tests the accessions nested within species effect

$$275 Y_{ijk} = \mu + \alpha_i \text{ species} + \beta_{ij} (\text{species } i \text{ accession } j) + \varepsilon_{ijk}$$

276 (M2) tests only the species effect when the accession effect is  
277 not significant

278  $Y_{ij} = \mu + \alpha_i \text{ species } i + \varepsilon_{ij}$

279 (M3) tests the interaction between species and time effect

280  $Y_{ijk} = \mu + \alpha_i \text{ species } i + \beta_j \text{ time } j + \gamma_{ij} (\text{species } i \text{ time } j) + \varepsilon_{ijk}$

281 (M4) tests the effect of interaction between species and the  
282 cofactor of interest

283  $Y_{ijk} = \mu + \alpha_i \text{ species } i + \beta_j \text{ cofactor } j + \gamma_{ij} (\text{species } j \text{ cofactor } j)$   
284  $+ \varepsilon_{ijk}$

285 Where:

286 Y: quantitative dependent variable e.g. measured phenotypic  
287 trait;  $\mu$ : is the overall mean;  $\alpha$ ,  $\beta$ , and  $\gamma$ : regression  
288 coefficients; species; accession; time; cofactor (e.g. initial  
289 rosette size, desiccation rate, initial leaf thickness, damage  
290 scores, days after wilting etc.): independent variables with the  
291 different levels i, j, and k;  $\varepsilon$ : prediction error.

292 We performed an ANOVA using Fisher's test (or Chi test for  
293 the binomial distribution of error) to identify the best model (P-  
294 value  $\leq 0.05$ ). Different error distributions were specified  
295 depending on the phenotypic trait. A negative binomial was  
296 used for number of days until wilting, soil moisture, initial  
297 rosette area, initial leaf thickness, damage scores, relative leaf  
298 water loss, stomatal density and stomata length. A Gaussian  
299 distribution was used for the desiccation rate and  $\delta^{13}\text{C}$ , a quasi-  
300 Poisson for the photosynthesis activity and quasi binomial for  
301 survival rate.

### 302 **Analysis of transcriptome variation during dry-** 303 **down**

304 In the third dry-down experiment, three to four young leaves of  
305 'hal2.2' and 'Plech61.2a', typical accessions of *A. halleri* and  
306 *A. lyrata*, respectively, were sampled from three replicate

307 individuals at three time points: 1) before water withdrawal  
308 (soil moisture around 60%), 2) before wilting symptoms  
309 appeared (20% to 25% of soil moisture), and 3) leaves formed  
310 during the recovery phase (10-15 days after re-watering). These  
311 two accessions are representative of the phenotypic diversity  
312 observed in the dry-down experiment. RNA extraction was  
313 performed using the *PureLink™ RNA Ambion Mini Kit*  
314 (Thermofisher, Darmstadt, Germany). RNA quality and  
315 quantity were checked by Agilent 2100 bioanalyzer (Agilent  
316 Technologies, Palo Alto, Calif.) using RNA nano chips. RNA  
317 of 18 leaf samples was sequenced on Illumina *HiSeq4000* by  
318 the Cologne Center for Genomics.

319 We used the *fastx-tool-kits* from the *FastQC* package (V0.11.4)  
320 for raw sequence quality trimming and filtering following He et  
321 al. (2016). Low quality nucleotides were removed from the 3'-  
322 ends of the sequences using 20 as a phred score threshold (t)  
323 and 50 as minimum length (l). Sequences were reverse  
324 complemented using *fastx\_reverse\_complement* to cut the other  
325 end as we did for the 3'-end. Reads with less than 90% bases  
326 above the quality threshold and paired-end reads with a single  
327 valid end were discarded. The resulted trimmed and filtered  
328 reads were mapped to the *A. lyrata* reference genome V1 (Hu *et*  
329 *al.*, 2011) using the software package *STAR* with standard  
330 parameters (Dobin & Gingeras, 2015). Transcriptome  
331 sequencing yielded a total of 15 million read pairs per sample,  
332 with a read length of 75 bp. We used 'samtools view -q 10' to  
333 select the uniquely and high quality mapping reads with a  
334 probability of correct mapping of 90%.

335 On average, more than 80% of all reads were uniquely mapped  
336 and around 20% of unmapped and multiple mapped reads (Fig.  
337 S1). R scripts developed by He F. were used to verify that reads  
338 covered the whole length of genes (and confirm that we had no  
339 sign of RNA degradation) and for counting the number of reads

340 mapped to each. The *DESeq2* Bioconductor package from *R*  
341 (*Bioconductor version: Release 3.5*) was used to find genes that  
342 were differentially expressed (DE) between the different  
343 conditions (Love *et al.*, 2014). We used Wald test to compute P  
344 values and the following design: ~ species/sample point, with  
345 two levels for the factor species (*A. halleri* and *A. lyrata*), and  
346 three levels for the factor sample point (leaves sampled at 60%  
347 of soil moisture, at 20-25% of soil moisture, and after  
348 recovery). Genes with a P value < 0.1 after Benjamini-  
349 Hochberg correction for false discovery rate (FDR) and log<sub>2</sub>-  
350 fold change  $\leq -0.5$  or  $\geq 0.5$  were considered as DE.

### 351 **Gene ontology analysis**

352 Functional enrichments among DE genes were performed using  
353 *org.At.tair.db* data package of *Bioconductor* and the rank test of  
354 the *TopGO* package (Alexa & Rahnenfuhrer, 2010) was used to  
355 identify enriched gene ontology terms. The *elim* algorithm  
356 followed by a *Fisher* test were used with a cut-off of 0.01. As  
357 background all expressed genes were used (around 12220  
358 genes). Enrichments were analyzed separately for: 1) all  
359 responsive genes, 2) down-regulated genes, and 3) up-regulated  
360 genes. The hyper-geometric test was used to test for the  
361 significance of gene overlap with a set of stress responsive  
362 genes (Matsui *et al.*, 2008).

## 363 **Results**

### 364 *Interspecific differences in stomatal density and stomata* 365 *length but not in water-use efficiency*

366 We evaluated whether, under well-watered conditions,  
367 constitutive physiological differences between *A. lyrata* and *A.*  
368 *halleri* can influence their potential to face limiting SWC.  
369 Variation in stomatal density on the leaf surface was explained  
370 by both within and between species variance (M1:  $F_{18, 469} =$

371 36.15, P-value  $< 2e^{-16}$ ;  $F_{1, 487}=256.59$ , P-value  $< 2.2e^{-16}$ ,  
372 respectively, Fig. 1a). In *A. lyrata* stomatal density on the  
373 abaxial leaf surface was lower than in *A. halleri* (on average 80  
374 and 150 stomata  $\text{mm}^{-2}$  in *A. lyrata* and *A. halleri*, respectively).  
375 In *A. thaliana*, it was reported that stomatal density varies from  
376 87 to 204 stomata  $\text{mm}^{-2}$  and it is negatively correlated with  
377 stomata length (Dittberner *et al.*, 2018). Stomata were larger in  
378 *A. lyrata* compared to *A. halleri* (P-value  $< 2e^{-16}$ ) and the  
379 genetic variation in stomata length was significant both within  
380 and between species (M1:  $F_{16, 1370} = 53.68$ , P-value  $< 2e^{-16}$ ;  $F_{1, 1386}=3801.39$ , P-value  $< 2.2e^{-16}$ , respectively). These differences  
382 however did not coincide with differences in carbon isotope  
383 discrimination ( $\delta^{13}\text{C}$ ), a commonly used proxy for water-use  
384 efficiency (WUE, Farquhar & Richards, 1984; Farquhar *et al.*,  
385 1989; Lambers *et al.*, 1998; Dawson *et al.*, 2002). In non-  
386 stressed conditions, leaf  $\delta^{13}\text{C}$  showed significant genetic  
387 variation within species, but not between *A. halleri* and *A.*  
388 *lyrata* (M1:  $F_{16, 54} = 7.440$ , P-value =  $9.76e^{-09}$ , and  $F_{1, 70} = 0.005$ ,  
389 P-value = 0.969, respectively Fig. 1b).

### 390 ***Wilting-related phenotypes revealed different drought*** 391 ***response strategies***

392 The day of first appearance of wilting symptoms differed  
393 significantly between species in the first experiment, although  
394 accessions within species also differed (M1:  $F_{2, 214}=316.48$ , P-  
395 value  $< 2.2e^{-16}$ , Fig. 3a,  $F_{48, 166} = 3.51$ , P-value =  $1.159e^{-09}$ , for  
396 species and accessions within species, respectively). The same  
397 result was observed in the second experiment (M1:  $F_{2, 201}=$   
398  $115.27$ , P-value  $< 2.2e^{-16}$ ,  $F_{33, 168} = 1.97$ , P-value = 0.0029, Fig.  
399 S2a). Wilting manifested differently in the three species. In *A.*  
400 *thaliana*, leaves became pale and curled laterally, in *A. lyrata*,  
401 they curled apically, and in *A. halleri* leaves changed to darker  
402 green and collapsed (Fig. 2). On average, *A. halleri* accessions  
403 wilted around five to seven days after water withdrawal, *A.*

404 *lyrata* accessions after 12 days and *A. thaliana* accessions after  
405 18 days (Fig. 3a, Table S4). Differences in the timing of wilting  
406 did not exactly coincide with SWC differences. At wilting, *A.*  
407 *halleri* and *A. lyrata* showed similar soil moisture (18-20%),  
408 whereas *A. thaliana* only wilted after soil moisture dropped  
409 below 10% (Fig. 3b, Table S5). Again, these effects were  
410 consistent across experiments (Fig. S2b). Significant  
411 differences were detected between species for soil moisture at  
412 wilting (M1:  $F_{2, 214} = 44.27$ ,  $P\text{-value} = 3.982e^{-16}$ ,  $F_{2, 201} = 181.60$ ,  
413  $P\text{-value} < 2.2e^{-16}$  for the first and second experiment  
414 respectively), and within species (M1:  $F_{48, 166} = 1.52$ ,  $P\text{-}$   
415  $\text{value} = 0.02$ ,  $F_{33, 168} = 2.23$ ,  $P\text{-value} = 0.00049$  for the first and  
416 second experiment respectively).

#### 417 ***A. halleri* plants exhaust SWC faster**

418 To understand why *A. halleri* plants wilted around one week  
419 earlier than *A. lyrata* but at a similar soil moisture, we  
420 evaluated the rate of soil water loss for each species. We  
421 detected a significant interaction between species and time on  
422 soil moisture before wilting which showed that soil moisture  
423 decreased faster in pots where *A. halleri* accessions grew (Fig.  
424 S3a, M3:  $F_{12, 1194} = 97.026$ ,  $P\text{-value} < 2.2e^{-16}$ ). *A. halleri* thus  
425 consumed water significantly faster than *A. thaliana* and *A.*  
426 *lyrata*. Here again, this observation was replicated in the  
427 second biological experiment (M3:  $F_{4, 1224} = 761.07$ ,  $P\text{-value} <$   
428  $2.2e^{-16}$ , Fig. S3b).

429 To examine the impact of plant size on the rate of soil water  
430 loss, we measured initial plant size and estimated the  
431 desiccation rate, defined as the rate of soil water loss per day  
432 over the seven days following the water withdrawal in the  
433 second experiment of the dry-down experiment. *A. lyrata* and  
434 *A. halleri* accessions started with similar rosette size, but *A.*  
435 *thaliana* rosettes were initially larger (M2:  $F_{2, 173} = 10.85$ ,  $P\text{-}$

436 value= 3.65e-05, Fig. S4a, Table S6). We detected a significant  
437 effect of the initial rosette area on the desiccation rate (M4 F<sub>1</sub>,  
438 <sub>170</sub>=16.10, P-value=8.97e<sup>-05</sup>) but no significant interaction  
439 between initial rosette area and species on desiccation rate (M4:  
440 F<sub>2</sub>, <sub>170</sub>=1.89, P-value=0.15). Therefore, the consumption of soil  
441 water does not scale with plant size even though significant  
442 correlations between desiccation rate and initial rosette size  
443 were detected in *A. halleri*, less in *A. thaliana* but not in *A.*  
444 *lyrata* (Fig. 4a).

445 ***A. lyrata* has the lowest relative loss of leaf water content**  
446 ***before wilting***

447 To estimate changes in leaf water content during the water-  
448 limited phase, we monitored leaf thickness (Lambers *et al.*,  
449 1998) during soil dry-down phase in the second biological  
450 experiment. Initial leaf thickness was significantly higher in *A.*  
451 *lyrata* plants compared to *A. thaliana* and *A. halleri* (M1: F<sub>2</sub>,  
452 <sub>140</sub>=9.38, P-value=0.00015, Fig. S4b, Table S7). We also  
453 detected a significant accessions effect within *A. lyrata* on the  
454 initial leaf thickness (F<sub>33</sub>, <sub>140</sub>= 1.642, P-value=0.02548).

455 The significant interaction effect of soil desiccation rate and  
456 species (M4, F<sub>2</sub>, <sub>818</sub>=11.15, P-value=1.667e-05) on leaf  
457 thickness change over time revealed that the correlation  
458 between leaf thickness and soil desiccation rate was significant  
459 only for *A. halleri* (Fig. 4b, Table S9). Furthermore, this  
460 analysis showed that *A. thaliana* leaves were able to hold  
461 higher amounts of water at lower soil moisture, compared to *A.*  
462 *lyrata* and *A. halleri* (Fig. 5), an indication that this species can  
463 effectively avoid the effects of drought by maintaining a  
464 comparatively higher water content in its leaves.

465 *A. thaliana* and *A. halleri*, however, lost similar amounts of  
466 water in the days preceding wilting. The relative loss of leaf  
467 water content before wilting was calculated by the ratio of leaf

468 thickness two days before wilting by leaf thickness seven days  
469 before wilting (Fig. 6). There was no significant accessions  
470 effect on the decrease of leaf thickness in the seven days before  
471 wilting (M1:  $F_{33, 138} = 0.9401$ , P-value=0.5663) but the relative  
472 decrease before wilting was significantly higher in *A. thaliana*  
473 and *A. halleri*, compared to *A. lyrata* (M1:  $F_{2,171} = 6.628$ , P-  
474 value= 0.001688, Fig. 6, Table S8). This pattern indicates that  
475 leaf water content in the days preceding the onset of wilting  
476 decreased more slowly in *A. lyrata* plants compared to *A.*  
477 *halleri* and *A. thaliana*. This suggests that wilting *A. lyrata*  
478 leaves experience lower loss of turgor.

479 ***High photosynthesis efficiency in wilted A. halleri and A.***  
480 ***lyrata plants***

481 Photosynthesis efficiency was measured to evaluate the  
482 physiological status of plants at wilting. We used  $F_v : F_m$  ratio,  
483 as indicator for the potential capacity of non-cyclic electron  
484 flow in the photosynthetic light reaction. Despite the collapsed  
485 or rolled leaves observed at wilting in *A. halleri* and *A. lyrata*,  
486 respectively, both still had a high photosynthetic capacity: on  
487 average 83 and 90%, respectively. By contrast, the  
488 photosynthetic capacity had significantly dropped in wilted *A.*  
489 *thaliana* rosettes (Fig. S5, Table S10).

490

491 ***A. thaliana has the lowest survival rate***

492 Individual plants were re-watered two days after observing  
493 symptoms of wilting. Two to three weeks after re-watering, we  
494 scored survival. The proportion of survivors was significantly  
495 lower in *A. thaliana* compared to *A. halleri* and *A. lyrata* (9, 85  
496 and 84%, respectively, Fig. 7, Table S11). These differences  
497 were consistent across the two experiments (Fig. S6).

498 To evaluate and compare the tolerance to wilting in *A. lyrata*  
499 and *A. halleri*, we ran an additional experiment examining



500 whether extending the time from wilting to re-watering  
501 impacted survival. We detected a significant interaction effect  
502 of species and time to re-watering on survival (M4: Chi-  
503 Squared=234, DF= 1, DF residuals=252, P-value=1.615e<sup>-04</sup>).  
504 We observed that 70-85% of *A. lyrata* plants survived 3 to 6  
505 day-long wilting periods (Fig. 7). In comparison, this  
506 percentage dropped to 10% for *A. halleri* plants after five days  
507 of wilting and this was significantly different between species  
508 (Fig. 7, M2:  $F_{1, 26} = 20.681$ , P-value = 0.0001109). These  
509 results indicate that *A. lyrata* is more tolerant to wilting than its  
510 sister species *A. halleri*.

#### 511 ***Efficient post-drought recovery in A. lyrata plants***

512 We further, assessed the tolerance to wilting by comparing  
513 damage exhibited by plants that survived two days of wilting in  
514 *A. lyrata* and *A. halleri*. The interaction between species and  
515 the damage score was found to be significant (M4,  $F_{3, 100} = 2.96$ ,  
516 P-value= 0.035). In *A. lyrata*, about 70% of plants showed a  
517 very low degree of damage in leaves, whereas in *A. halleri*,  
518 only 30% of plants had low damage levels (Fig. 8,  $F_{1, 25} =$   
519 24.063, P-value= 4.761e<sup>-05</sup>). We did not include *A. thaliana* in  
520 the statistical analysis because only 10 out of 60 plants survived  
521 wilting. These results confirmed that *A. lyrata* tolerates soil  
522 dehydration and wilting better than *A. halleri*.

#### 523 ***Transcriptome analysis confirms that A. halleri is more*** 524 ***sensitive to low SWC***

525 *A. lyrata* and *A. halleri* both wilted at the same SWC but they  
526 differed in their survival following wilting. In order to gain  
527 insight into the molecular changes underpinning these  
528 differences, we performed a third dry-down experiment to  
529 collect leaf material in one representative accession of each of  
530 the sister species *A. halleri* and *A. lyrata* and examined the  
531 reaction to stress and recovery at the transcriptome level.

532 For each species, we compared transcript abundance at three  
533 time points during the dry-down experiment, i.e., at soil  
534 moisture 60%, soil moisture 20-25% and after recovery. The  
535 two species wilted at around 18% of soil moisture, as observed  
536 in the first two experiments, i.e., just below the soil moisture  
537 level at which leaf material was sampled. 107 and 976 genes  
538 changed expression level at 20-25 vs. 60% soil moisture in *A.*  
539 *lyrata* and *A. halleri*, respectively (FDR 0.1; fold-change >1.6).  
540 Only three genes were responsive in both species to the  
541 decrease in SWC and this was a random overlap  
542 (*hypergeometric test, P-value=0.993*).

543 After recovery, 275 and 20 *A. lyrata* and *A. halleri* genes,  
544 respectively, had changed expression level compared to the  
545 non-stress SW (Table 1). Since both species had similarly high  
546 survival rates upon two days of wilting and because new  
547 undamaged leaves were sampled, these differences are not due  
548 to survival differences. We conclude that *A. halleri* displayed a  
549 comparatively sharpened response to low SWC, whereas the  
550 transcriptome of *A. lyrata* was comparatively more altered after  
551 recovery.

552 In a previous study, 2975 and 5445 genes were shown to be  
553 responsive to two and 10 hours of dehydration in *A. thaliana*  
554 respectively (Matsui *et al.*, 2008). These drought-responsive  
555 genes were enriched in all sets of responsive genes identified in  
556 our study, either in *A. halleri* or in *A. lyrata*, at 20% soil  
557 moisture or after recovery (Table 2, *hypergeometric test*,  
558 maximum  $p \leq 8.77E-19$ ). This confirmed that our protocol  
559 succeeded in activating dehydration responsive genes. The list  
560 of significantly differentially expressed genes (including only  
561 AGI codes) is provided in Table S12.

562 ***Different GO categories are regulated in the two species***

563 Analysis of enrichment in Gene Ontology (GO) categories  
564 confirmed that different sets of genes were activated in the two  
565 species at each sampling stage. In *A. halleri* many genes  
566 involved in growth and development were down regulated  
567 when SWC decreased to 20-25%, (Table 3). These functions  
568 were not enriched in *A. lyrata* samples collected at the same  
569 time, instead genes involved in response to water deprivation  
570 and in ethylene and ABA signaling pathways were up regulated  
571 in *A. lyrata* after recovery (Table 3). Several GO terms  
572 appeared enriched, including isopentenyl diphosphate  
573 metabolic process, response to water deprivation, hyperosmotic  
574 salinity response, photosynthesis light reaction, response to  
575 chitin, photosystem II assembly, and maltose metabolic process  
576 (Table 3). They were also enriched among genes responding to  
577 mild drought stress in *A. thaliana*, although the direction of the  
578 gene expression change was not the same (Des Marais *et al.*,  
579 2012). We further observed that genes with altered expression  
580 in *A. halleri* were enriched for genes functioning in plastid  
581 organization, pentose-phosphate shunt and photosystem II  
582 assembly. These three GO categories harbor an excess of *cis*-  
583 acting changes in the *A. halleri* lineage in response to  
584 dehydration stress (He *et al.*, 2016).

## 585 **Discussion**

586 In our experimental design, we have used several accessions  
587 per species as we were interested in comparing the drought  
588 stress response of the three related species, while accounting  
589 for variation within species. Our results showed genotypic  
590 differences in initial leaf thickness, initial stomatal density or  
591 initial rosette area, but the response to depletion in SWC did  
592 not reveal significant differences between accessions.  
593 Differences in the response to water depletion therefore

594 revealed fixed interspecific differences in avoidance and  
595 tolerance strategies to drought stress.

596 ***Critical SWC does not reflect ecological differences between***  
597 ***A. halleri and A. lyrata***

598 The sister species *A. lyrata* and *A. halleri* have separated  
599 recently and gene flow between the clades is still detectable  
600 (Novikova *et al.*, 2016). Yet, the two species display marked  
601 differences in ecological preference (Clauss & Koch, 2006).  
602 Ellenberg indices, which are reliable estimates of ecological  
603 preferences in Central Europe, show that *A. lyrata* is found in  
604 very dry areas with a soil humidity index (F) of 3, while *A.*  
605 *halleri* occurs in habitats where water is less limiting (F= 6)  
606 (Ellenberg & Leuschner, 2010). We were therefore surprised to  
607 observe that *A. halleri* and *A. lyrata* individuals wilted at  
608 identical soil water content. In addition, contrary to our  
609 expectations, the ruderal species *A. thaliana* tolerated markedly  
610 lower levels of soil water content than its perennial relatives.  
611 Altogether, these observations show that the ecological  
612 preferences of *A. lyrata*, *A. halleri* and *A. thaliana* are not  
613 explained by the SWC threshold at which wilting symptoms  
614 appear.

615 ***A. halleri is directly exposed to stress caused by low SWC***

616 We observed that *A. halleri* was the fastest to consume the  
617 water contained in the soil. In pots where *A. halleri* individuals  
618 grew, SWC decreased significantly faster (Fig. S3). *A. halleri*  
619 also displayed the strongest correlation between plant size and  
620 the rate of water consumption and an accelerated decrease in  
621 leaf thickness preceding the onset of wilting (Fig. 4-6). At 25%  
622 soil water content, i.e. shortly before the appearance of the first  
623 wilting symptoms, the rate of decrease in leaf thickness  
624 accelerated in *A. halleri* compared to *A. lyrata*. This turning  
625 point coincided with a change in the expression levels of a

626 larger number of genes belonging to stress-repressed GO  
627 categories such as leaf morphogenesis, cell proliferation, or  
628 photosynthesis. The down-regulation of growth-related genes  
629 we observed, even before wilting symptoms appear, indicates  
630 that the plant experiences direct stress at the cellular level as  
631 SWC approaches the limiting threshold. In agreement with the  
632 high levels of stress it experienced, *A. halleri* also showed a  
633 comparatively higher damage when survivors resumed growth  
634 after stress.

635 *A. halleri* thus displayed the weakest levels of drought  
636 avoidance of the three species. *A. halleri* thrives in more  
637 competitive habitats than its relatives (Clauss & Koch, 2016;  
638 Stein *et al.*, 2017), and competitive ability generally evolves in  
639 a trade-off with stress tolerance in plant species (Grime *et al.*,  
640 1977; Sreenivasulu *et al.*, 2012). In addition, high stomatal  
641 density has been associated with elevated growth rates and  
642 lower drought resistance (Doheny-Adams *et al.*, 2012; Liu *et al.*,  
643 2012). *A. halleri* indeed displayed higher stomatal density  
644 than *A. lyrata*. It is therefore possible that improved  
645 competitive ability was selected in this lineage at the expense  
646 of tolerance and avoidance mechanisms. Such evolutionary  
647 scenarios have been documented in several grass species  
648 (Fernández & Reynolds, 2000; Liancourt *et al.*, 2005;  
649 Sugiyama, 2006). Interestingly, we have previously observed  
650 that an excess of *cis*-acting changes up-regulating gene  
651 expression after one hour of dehydration had accumulated in  
652 the *A. halleri* lineage in several functions that the more tolerant  
653 species *A. lyrata* down-regulates during recovery (He *et al.*,  
654 2016). It is therefore possible that the loss of tolerance and  
655 avoidance of drought stress was advantageous in the context of  
656 selection for increased competitive ability.

657 *A. lyrata displays avoidance and tolerance responses to soil*  
658 *dehydration*

659 By comparison with *A. halleri*, *A. lyrata* displayed a more  
660 parsimonious use of water. On the leaf surface, lower stomatal  
661 density (Fig. 1a) suggests a greater ability to maintain water  
662 levels in water-limiting conditions. In monkey flowers, for  
663 example, low stomatal density was associated with higher  
664 WUE (Wu *et al.*, 2010). Although under well-watered  
665 conditions *A. lyrata* did not show a globally higher WUE than  
666 *A. halleri* (Fig. 1b), its decreased stomatal density may allow  
667 better performance in drought stress conditions. *A. lyrata* plants  
668 displayed both a lower rate of water consumption and markedly  
669 lower damage levels after resuming growth. In addition, we  
670 observed that *A. lyrata* plants had the ability to survive longer  
671 durations of wilting than both *A. halleri* and *A. thaliana* (Fig.  
672 7). It is also the only species that showed adaxial leaf rolling, a  
673 phenotype favoring drought avoidance in plants (Oppenheimer,  
674 1960; O'Toole & Moya, 1978; Jones, 1979; Clarke, 1986). Leaf  
675 rolling indeed reduces transpiration rate by reducing the  
676 effective leaf area. Altogether, this indicates that exposure to  
677 limiting SWC is comparably less damaging in *A. lyrata*.

678 The transcriptome response to decreasing SWC corroborated  
679 this observation, by documenting lower levels of cellular stress  
680 in *A. lyrata* immediately before wilting, compared to *A. halleri*.  
681 Only a few genes changed expression before wilting in *A.*  
682 *lyrata*. We further observed that among genes down-regulated  
683 after recovery, the most enriched GO category is 'pentose-  
684 phosphate shunt' ( $p < 5 \cdot 10^{-5}$ ), a metabolic pathway involved in  
685 the scavenging of reactive oxygen intermediates that is strongly  
686 activated by abiotic stress (Mittler, 2002; Kruger & von  
687 Schaewen, 2003). Several additional GO functions associated  
688 with drought stress, such as 'hyperosmotic salinity response',  
689 'response to water deprivation', 'abscisic acid-activated  
690 signaling pathway', 'ethylene-activated signaling pathway',  
691 and 'response to chitin' were up-regulated in *A. lyrata* during

692 recovery. The latter functions seem to have a dynamic role in  
693 drought stress. In *A. thaliana*, they were up-regulated by severe  
694 fast wilting (Matsui et al. 2008) but down-regulated by mild  
695 stress (Des Marais *et al.*, 2012). Their up-regulation after  
696 recovery in *A. lyrata*, in the absence of obvious stress, shows  
697 that the reaction of this species to lowering SWC contrasts not  
698 only with that displayed by *A. halleri* but also with that known  
699 for *A. thaliana*. The absence of a strong modification of the  
700 expression of drought-stress responsive genes at SWC  
701 approaching critical levels in *A. lyrata*, combined with a high  
702 survival rate, further indicates that this species has the ability to  
703 i) minimize its exposure to the stressful consequences of low  
704 soil water content and ii) maximize its ability to survive severe  
705 dehydration. It thus deploys both avoidance and tolerance  
706 strategies.

707 ***High levels of stress avoidance associate with low tolerance to***  
708 ***drought in A. thaliana***

709 In annual species, seasonal drought can be a potent source of  
710 selection for accelerated flowering and faster cycling (Franks *et*  
711 *al.*, 2007; Fitter & Fitter, 2002). *A. thaliana* was therefore  
712 expected to maximize its resource investment into fast cycling  
713 and show a lower level of stress tolerance compared to its  
714 perennial relatives. Here, we focused on late flowering *A.*  
715 *thaliana* accessions that in the conditions we imposed could not  
716 accelerate their development to escape drought. This allowed  
717 comparing their ability to avoid or tolerate wilting. Contrary to  
718 expectations, we observed that our sample of accessions could  
719 persist at lower SWC than both of their perennial relatives, *A.*  
720 *lyrata* and *A. halleri* (Fig. 3a). In addition, the delayed decrease  
721 in leaf thickness observed in *A. thaliana* shows that, compared  
722 to the other two species, it is able to maintain its leaf water  
723 content at lower SWC (Fig. 5). This therefore suggests that the  
724 annual species *A. thaliana* also employs stress avoidance

725 mechanisms. The ability of this annual species to escape stress  
726 by accelerating development has therefore not led to the loss of  
727 mechanisms favoring the maintenance of internal water  
728 potentials. Indeed, the production of proline, which is both an  
729 osmoprotectant and an anti-oxidant,  $\delta^{13}\text{C}$ , a proxy measuring  
730 WUE, as well as the maintenance of photosynthesis during  
731 terminal drought have been documented to play a role in local  
732 adaptation in this species (Verslues & Juenger, 2011; Kesari *et*  
733 *al.*, 2012; Exposito-Alonso *et al.*, 2017; Dittberner *et al.*, 2018).

734 *A. thaliana*, however, was not able to tolerate wilting. We  
735 observed a marked decrease in the photosynthetic capacity at  
736 wilting in this species, as previously reported in several species  
737 such as *Hordeum vulgare*, *Hibiscus rosa-sinensis*, and  
738 *Andropogon gerardii* (Golding & Johnson, 2003; Muñoz &  
739 Quiles, 2013; Maricle *et al.*, 2017). In addition, *A. thaliana* did  
740 not survive after two days of wilting, although its perennial  
741 relatives displayed markedly higher survival rates. The annual  
742 species therefore appears to have evolved lower levels of  
743 tolerance to wilting.

744 We detected no significant variation for the response to  
745 decreasing SWC between the *A. thaliana* accessions included  
746 in this study, however, we cannot conclude that the avoidance  
747 capacity and the low tolerance to wilting we observed is fixed  
748 in the species. The *A. thaliana* population we used consisted of  
749 a set of late-flowering accessions from Spain that could not  
750 accelerate flowering fast enough to escape stress. This set of  
751 accessions is not necessarily representative of the whole  
752 species. *A. thaliana* is broadly distributed and its accessions can  
753 form ecotypes with markedly different levels of stress  
754 resistance (May *et al.*, 2017). Furthermore, two recent studies  
755 indicate that Swedish accessions have a comparatively greater  
756 capacity to face dry conditions, probably because the short  
757 favorable season of Scandinavia constrains them to face



758 limiting water availability when it strikes (Exposito-Alonso *et*  
759 *al.*, 2017, Dittberner *et al.*, 2018).

760 This study documents the contrasting reactions deployed by  
761 *Arabidopsis* species in response to lowering SWC. In the face  
762 of their respective ecologies, these diversified reactions likely  
763 reflect the priority shifts imposed by divergent ecologies and  
764 life cycles. Future studies aiming at dissecting the genetic and  
765 molecular underpinning of these differences promise to teach  
766 us much about the processes accompanying ecological  
767 diversification in plant species.

768

769

770

771

772

773

774

775

776

777

778

779

780

781

782

783

784

785 **Table 1:** Number of significantly differentially expressed genes  
786 in *Arabidopsis halleri* and *A. lyrata* during the dry-down  
787 experiment at 20% of soil moisture or after recovery compared  
788 to expression before stress (60% of soil moisture).

|                                  |      | <i>A. halleri</i> | <i>A. lyrata</i> |
|----------------------------------|------|-------------------|------------------|
| 20% vs 60% of soil moisture      | Up   | 253               | 36               |
|                                  | Down | 676               | 71               |
| recovery vs 60% of soil moisture | Up   | 8                 | 111              |
|                                  | Down | 12                | 156              |

789

790

791

792

793

794

795

796

797

798

799

800

801

802

803

804

805

806

807

808

809

810

811 **Table 2:** Percentage of differentially expressed genes that  
 812 overlap with differentially expressed genes reported in Matsui  
 813 *et al.*, (2008) after 2 h (dh2) and 10 h (dh10) of dehydration  
 814 stress (N.S.: not significant). The random expectation of  
 815 overlap % is indicated in bold on the top row.

|                                                    |                      | <b>dh2</b><br><b>expected:</b><br><b>up 7.39%</b><br><b>down 10%</b> | <b>dh10</b><br><b>expected:</b><br><b>up 10%</b><br><b>down 7.5%</b> |
|----------------------------------------------------|----------------------|----------------------------------------------------------------------|----------------------------------------------------------------------|
| <b>A. halleri 20% vs 60% of soil moisture</b>      | Up (127 ATG genes)   | 27.5% <i>P</i> = 1.09E-12                                            | 47.2% <i>P</i> = 7.82E-28                                            |
|                                                    | Down (385 ATG genes) | 12.4% <i>P</i> = 6.03E-23                                            | 36.3% <i>P</i> = 1.17E-59                                            |
| <b>A. halleri recovery vs 60% of soil moisture</b> | Up (6 ATG genes)     | 0 N.S.                                                               | 0 N.S.                                                               |
|                                                    | Down (7 ATG genes)   | 0 N.S.                                                               | 28.5% <i>P</i> = 1.20E-02                                            |
| <b>A. lyrata 20% vs 60% of soil moisture</b>       | Up (15 ATG genes)    | 40% <i>P</i> = 4.52E-05                                              | 46.6% <i>P</i> = 3.34E-05                                            |
|                                                    | Down (37 ATG genes)  | 5.4% N. S.                                                           | 18.9% <i>P</i> = 5.7E-03                                             |
| <b>A. lyrata recovery vs 60% of soil moisture</b>  | Up (61 ATG genes)    | 63.9% <i>P</i> = 1.06E-30                                            | 54% <i>P</i> = 8.77E-19                                              |
|                                                    | Down (90 ATG genes)  | 11.1% N. S.                                                          | 32.2% <i>P</i> =1.63E-12                                             |

816

817

818

819

820

821

822

823

824

825

826 **Table 3:** GO Categories Showing a Significant Enrichment (P  
 827 < 0.01) among differentially expressed genes between 20% and  
 828 60% of soil moisture and between recovery and 60% of soil  
 829 moisture for *Arabidopsis halleri* and *A. lyrata*.

|                                                               | GO.ID      | Term                                      | pvalue   | Gene regulation |
|---------------------------------------------------------------|------------|-------------------------------------------|----------|-----------------|
| <i>A. halleri</i><br>20% vs<br>60% of<br>soil<br>moisture     | GO:0015979 | photosynthesis                            | 0.0011   | down            |
|                                                               | GO:1901576 | organic substance biosynthetic process    | 0.0013   | down            |
|                                                               | GO:0044711 | single-organism biosynthetic process      | 0.0014   | down            |
|                                                               | GO:0051188 | cofactor biosynthetic process             | 0.0023   | down            |
|                                                               | GO:0008283 | cell proliferation                        | 0.0035   | down            |
|                                                               | GO:0006098 | pentose-phosphate shunt                   | 0.0041   | down            |
|                                                               | GO:0009965 | leaf morphogenesis                        | 0.0048   | down            |
|                                                               | GO:0009657 | plastid organization                      | 0.0059   | down            |
|                                                               | GO:0042254 | ribosome biogenesis                       | 0.0059   | down            |
|                                                               | GO:0006084 | acetyl-CoA metabolic process              | 0.0064   | down            |
| <i>A. lyrata</i><br>recovery<br>vs 60% of<br>soil<br>moisture | GO:0006098 | pentose-phosphate shunt                   | 0.000043 | down            |
|                                                               | GO:0010200 | response to chitin                        | 0.000051 | up              |
|                                                               | GO:0010207 | photosystem II assembly                   | 0.00007  | down            |
|                                                               | GO:0000023 | maltose metabolic process                 | 0.00017  | down            |
|                                                               | GO:0009873 | ethylene-activated signaling pathway      | 0.0002   | up              |
|                                                               | GO:0019252 | starch biosynthetic process               | 0.00039  | down            |
|                                                               | GO:0009612 | response to mechanical stimulus           | 0.0015   | up              |
|                                                               | GO:0009414 | response to water deprivation             | 0.0029   | up              |
|                                                               | GO:0042538 | hyperosmotic salinity response            | 0.0043   | up              |
|                                                               | GO:0051707 | response to other organism                | 0.005    | up              |
|                                                               | GO:0009657 | plastid organization                      | 0.00571  | down            |
|                                                               | GO:0050790 | regulation of catalytic activity          | 0.00763  | down            |
|                                                               | GO:0042742 | defense response to bacterium             | 0.00784  | down            |
|                                                               | GO:0009738 | abscisic acid-activated signaling pathway | 0.0086   | up              |

830

831

832

833

834

835

836

837

838

839

## 840 **Acknowledgements**

841 We thank Agustín Arce, Kim Steige, Ulrike Goebel, Hannes  
842 Dittberner, Veronica Preite, Julia Plewka, Nina Grisard and  
843 Kirsten Bell for their technical support. Ute Krämer for  
844 providing *A. halleri* accessions, commenting on experimental  
845 set up, and commenting on the manuscript draft. The Cologne  
846 Center for Genomics for performing HiSeq4000 RNA  
847 sequencing. This work was supported by the DFG priority  
848 program 1529 ‘ADAPTOMICS’. TMA and APMW appreciate  
849 funding from EXC 1028.

## 850 **Author Contributions**

851 M.B., J.M. and G.S. designed the experiments; M.B. performed  
852 the experiments; M.B., F.H., G.S. and J.M. interpreted the data;  
853 R.E.H. supervised the photosynthesis measurements; A.P.M.W.  
854 and T.M. quantified  $\delta^{13}\text{C}$ ; M.B. and J.M. wrote the manuscript  
855 with input from all co-authors.

## 856 **References**

- 857 **Alexa A, Rahnenfuhrer J. 2010.** topGO: *enrichment analysis*  
858 *for Gene Ontology*. R package version 2.20.0.
- 859 **Becher M, Talke IN, Krall L, Krämer U. 2004.** Cross-species  
860 microarray transcript profiling reveals high constitutive  
861 expression of metal homeostasis genes in shoots of the zinc  
862 hyperaccumulator *Arabidopsis halleri*. *The Plant Journal* **37**:  
863 251-268.
- 864 **Bechtold U, Penfold CA, Jenkins DJ, Legaie R, Moore JD,**  
865 **Lawson T, Matthews JSA, Violet-Chabrand SRM, Baxter**  
866 **L, Subramaniam S, et al. 2016.** Time-series transcriptomics  
867 reveals that AGAMOUS-LIKE22 affects primary metabolism  
868 and developmental processes in droughtstressed *Arabidopsis*.  
869 *Plant Cell* **28**: 345-366.

- 870 **Bewley JD. 1997.** Seed Germination and Dormancy. *Plant Cell*  
871 **9:** 1055-66.
- 872 **Bohnert HJ, Nelson DE, Jensen RG. 1995.** Adaptations to  
873 environ-mental stresses. *Plant Cell* **7:** 1099-1111.
- 874 **Boyer JS. 1982.** Plant productivity and environment. *Science*  
875 **218:** 443-448.
- 876 **Bray EA, Bailey-Serres J, Weretilnyk E. 2000.** “Responses  
877 to abiotic stresses,” in Biochemistry and Molecular Biology of  
878 Plants, eds B. B. Buchanan, W. Gruissem, and R. L. Jones  
879 (Rockville: American Society of Plant Physiologists), 1158-  
880 1203.
- 881 **Bray EA. 1997.** Plant responses to water deficit. *Trends in*  
882 *plant science* vol. 2 N. 2.
- 883 **Bray EA. 2004.** Genes commonly regulated by water-deficit  
884 stress in *Arabidopsis thaliana*. *Journal of Experimental Botany*,  
885 Vol. 55, No. 407.
- 886 **Clarke JM. 1986.** Effect of leaf rolling on leaf water loss in  
887 *Trilicam* spp. *Can. J. Plant Sci.* **66:** 885-891.
- 888 **Clauss MJ, Koch MA. 2006.** Poorly known relatives of  
889 *Arabidopsis thaliana*. *TRENDS in Plant Science* **9:**449-59.
- 890 **Close TJ. 1996.** Dehydrins: Emergence of a biochemical role  
891 of a family of plant dehydration proteins. *Physiol. Plant* **97:**  
892 795-803.
- 893 **Dawson TE, Mambelli S, Plamboeck AH, Templer PH, Tu**  
894 **KP. 2002.** Stable isotopes in plant ecology. *Annu. Rev. Ecol.*  
895 *Syst.* **33:**507-559.
- 896 **Des Marais DL, McKay JK, Richards JH, Saunak S,**  
897 **Tierney W, Juenger TE. 2012.** Physiological Genomics of  
898 Response to Soil Drying in Diverse *Arabidopsis* Accessions.  
899 *The Plant Cell* **24:** 893–914.

- 900 **Dittberner H, Korte A, Mettler-Altmann T, Weber APM,**  
901 **Monroe G, de Meaux J. 2018.** Natural variation in stomata  
902 size contributes to the local adaptation of water-use efficiency  
903 in *Arabidopsis thaliana*. bioRxiv, doi:  
904 <http://dx.doi.org/10.1101/253021>
- 905 **Dobin A, Gingeras TR. 2016.** Mapping RNA-seq Reads with  
906 STAR. *Curr. Protoc. Bioinformatics*, **51**: 11.14.1-11.14.19.
- 907 **Doheny-Adams T, Hunt L, Franks PJ, Beerling DJ, Gray**  
908 **JE. 2012.** Genetic manipulation of stomatal density influences  
909 stomatal size, plant growth and tolerance to restricted water  
910 supply across a growth carbon dioxide gradient. *Philosophical*  
911 *Transactions of the Royal Society B: Biological Sciences* **367**:  
912 547-555.
- 913 **Durvasula A, Fulgione A, Gutaker RM, Alacakaptan SI,**  
914 **Flood PJ, Neto C, Tsuchimatsu T, Burbano HA, Pico FX,**  
915 **Alonso-Blanco C, et al. 2017.** African genomes illuminate the  
916 early history and transition to selfing in *Arabidopsis thaliana*.  
917 *Proc Natl Acad Sci U S A* **114**:5213-5218.
- 918 **Ellenberg H, Leuschner C. 2010.** *In the additional material of*  
919 *Vegetation Mitteleuropas mit den Alpen*. Ed.6.
- 920 **Exposito-Alonso M, Vasseur F, Ding W, Wang G, Burbano**  
921 **HA, Weigel D. 2017.** Genomic basis and evolutionary potential  
922 for extreme drought adaptation in *Arabidopsis thaliana*.  
923 *BioRxiv*: doi: <http://dx.doi.org/10.1101/118067>
- 924 **Fang Y, Xiong L. 2015.** General mechanisms of drought  
925 response and their application in drought resistance  
926 improvement in plants. *Cell. Mol. Life Sci.* **72**:673-689.
- 927 **Farooq M, Wahid A, Kobayashi N, Fujita D, Basra SMA.**  
928 **2009.** Plant drought stress: effects, mechanisms and  
929 management. *Agronomy for Sustainable Development*,  
930 *Springer Verlag (Germany)*, **29** (1), pp.185-212.

- 931 **Farquhar GD, Ehleringer J, Hubick K. 1989.** Carbon isotope  
932 discrimination and photosynthesis. *Annual Review of Plant*  
933 *Physiology and Plant Molecular Biology* **40**: 503-537.
- 934 **Farquhar GD, Richards A. 1984.** Isotopic Composition of  
935 Plant Carbon Correlates with Water-use Efficiency of Wheat  
936 Genotypes. *Australian Journal of Plant Physiology* **11**: 539–  
937 552.
- 938 **Fernández TJ, Reynolds JF. 2000.** Potential growth and  
939 drought tolerance of eight desert grasses: lack of a trade-off?  
940 *Oecologia* **123**: 90-98
- 941 **Fitter AH, Fitter RSR. 2002.** Rapid changes in flowering time  
942 in British plants. *Science* **296**: 1689-1691.
- 943 **Fox GA. 1990.** Drought and the evolution of flowering time in  
944 desert annuals. *American Journal of Botany* **77**: 1508-1518.
- 945 **Franks SJ, Sim S, Weis AE. 2007.** Rapid evolution of  
946 flowering time by annual plant in response to a climate  
947 fluctuation. *Proceedings of the National Academy of Sciences,*  
948 *USA* **104**: 1278-1282.
- 949 **Fukai S, Cooper M. 1995.** Development of drought-resistant  
950 cultivars using physiomorphological traits in rice. *Field Crops*  
951 *Research* **40**: 67-86.
- 952 **Genty B, Briantais JM, Baker NR. 1989.** The relationship  
953 between the quantum yield of photosynthetic electron transport  
954 and quenching of chlorophyll fluorescence. *Biochimica et*  
955 *Biophysica Acta* **990**: 87-92.
- 956 **Golding AJ, Johnson GN. 2003.** Down-regulation of linear  
957 and activation of cyclic electron transport during drought.  
958 *Planta* **218**: 107–114.



- 959 **Golovina EA, Wolkers WF, Hoekstra FA. 1997.** Long-term  
960 stability of protein secondary structure in dry seeds. *Comp.*  
961 *Biochem. Physiol.* **117A**: 343-348.
- 962 **Gowik U, Brautigam A, Weber KL, Weber APM, Westhoff**  
963 **P. 2011.** Evolution of C-4 Photosynthesis in the Genus  
964 *Flaveria*: How Many and Which Genes Does It Take to Make  
965 C-4 *Plant Cell* **23** **6**:2087-2105.
- 966 **Grime JP. 1977.** Evidence for the Existence of Three Primary  
967 Strategies in Plants and Its Relevance to Ecological and  
968 Evolutionary. *The American Naturalist* Vol. 111. NO. 982.
- 969 **Harb A, Krishnan A, Ambavaram Madana MR, Pereira A.**  
970 **2010.** Molecular and Physiological Analysis of Drought Stress  
971 in *Arabidopsis* Reveals Early Responses Leading to  
972 Acclimation in Plant Growth. *Plant Physiology* **154**: 1254-  
973 1271.
- 974 **He F, Arce AL, Schmitz G, Koornneef M, Novikova P,**  
975 **Beyer A, de Meaux J. 2016.** The Footprint of Polygenic  
976 Adaptation on Stress-Responsive Cis-Regulatory Divergence in  
977 the *Arabidopsis* Genus. *Mol. Biol. Evol.*  
978 doi:10.1093/molbev/msw096.
- 979 **Hoffmann AA, Sgrò CM. 2011.** Climate change and  
980 evolutionary adaptation. *Nature* 479 (Vol. 470).
- 981 **Hoffmann MH. 2005.** Evolution of the realized climatic niche  
982 in the genus *Arabidopsis* (Brassicaceae). *Evolution* **59**:1425-  
983 1436.
- 984 **Hu H, Xiong L. 2014.** Genetic engineering and breeding of  
985 drought-resistant crops. *Annu. Rev. Plant Biol.* **65**: 715-741.
- 986 **Hu TT, Pattyn P, Bakker E, et al. 2011.** The *Arabidopsis*  
987 *lyrata* genome sequence and the basis of rapid genome size  
988 change. *Nat Genet.* **43**:476-481.

- 989 **Ingram J, Bartels D. 1996.** The Molecular Basis of  
990 Dehydration Tolerance in Plants. *Annu Rev Plant Physiol.*  
991 *Plant Mol. Biol.* **47**: 377-403.
- 992 **Iuchi S, Kobayashi M, Taji T, Naramoto M, Seki M, Kato**  
993 **T, Tabata S, Kakubari, Y, Yamaguchi-Shinozaki K,**  
994 **Shinozaki K. 2001.** Regulation of drought tolerance by gene  
995 manipulation of 9-*cis*-epoxycarotenoid dioxygenase, a key  
996 enzyme in abscisic acid biosynthesis in *Arabidopsis*. *The Plant*  
997 *Journal* **27**: 325–333.
- 998 **Jones HG.1979.** Visual estimation of plant water status in  
999 cereals. *J. Agric. Sci.* **92**: 83-89.
- 1000 **Juenger TE. 2013.** Natural variation and genetic constraints on  
1001 drought tolerance. *Curr. Opin. Plant Biol.* **16**: 274-281.
- 1002 **Kermode A. 1997.** Approaches to elucidate the basis of  
1003 desiccation-tolerance in seeds. *Seed Science Research* **7**(2) :  
1004 75-95.
- 1005 **Kesari R, Lasky JR, Villamor JG, Des Marais DL, et al.**  
1006 **2012.** Intron-mediated alternative splicing of *Arabidopsis*  
1007 *P5CS1* and its association with natural variation in proline and  
1008 climate adaptation. *PNAS* **109** (23): 9197-9202.
- 1009 **Kooyers NJ. 2015.** The evolution of drought escape and  
1010 avoidance in natural herbaceous populations. *Plant Science*  
1011 **234**:155-162.
- 1012 **Krämer U, Clemens S. 2006.** Functions and homeostasis of  
1013 zinc, copper and nickel in plants. In: Tamas MJ, Martinoia E,  
1014 eds. Molecular biology of metal homeostasis and  
1015 detoxification. *Heidelberg, Germany: Springer-Verlag* 215-  
1016 271.
- 1017 **Kronholm I, Picó FX, Alonso-Blanco C, Goudet J, de**  
1018 **Meaux JD. 2012.** Genetic basis of adaptation in *Arabidopsis*

- 1019 *thaliana*: local adaptation at the seed dormancy QTL DOG1.  
1020 *Evolution* **66**: 2287-2302.
- 1021 **Kruger NJ, von Schaewen A. 2003.** The oxidative pentose  
1022 phosphate pathway: structure and organization. *Current*  
1023 *Opinion in Plant Biology* **6**: 236-246.
- 1024 **Levitt J. 1980.** Responses of plants to environmental stresses.  
1025 *New York: Academic Press.*
- 1026 **Liancourt P, Callaway RM, Michalet R. 2005.** Stress  
1027 tolerance and competitive-response ability determine the  
1028 outcome of biotic interactions. *Ecology* **86**: 1611-1618.
- 1029 **Liu J, Zhang F, Zhou J, Chen F, Wang B, Xie X. 2012.**  
1030 Phytochrome B control of total leaf area and stomatal density  
1031 affects drought tolerance in rice. *Plant Mol Biol* **78**: 289-300.
- 1032 **Lovell JT, Juenger TE, Michaels SD, Lasky JR, Platt A,**  
1033 **Richards JH, Yu X, Easlon HM, Sen S, McKay JK. 2013.**  
1034 Pleiotropy of FRIGIDA enhances the potential for multivariate  
1035 adaptation. *Proc. R. Soc. B.* **280**: 2013-1043.
- 1036 **Lovell JT, Mullen JL, Lowry DB, Awole K, Richards JH,**  
1037 **Sen S, Verslues PE, Juenger TE, McKay JK. 2015.**  
1038 Exploiting Differential Gene Expression and Epistasis to  
1039 Discover Candidate Genes for Drought-Associated QTLs in  
1040 *Arabidopsis thaliana*. *The Plant Cell* **27**: 969-983.
- 1041 **Ludlow MM. 1989.** Strategies of response to water stress.  
1042 Structural and Functional Responses to Environmental Stresses  
1043 (eds Kreeb KH Richter H Hinckley TM), pp. 269-281. SPB  
1044 Academic, The Hague.
- 1045 **Maricle BR, Caudle KL, Lindsey KJ, Baer SG, Johnson**  
1046 **LC. 2017.** Effects of Extreme Drought on Photosynthesis and  
1047 Water Potential of *Andropogon gerardii* (Big Bluestem)  
1048 Ecotypes in Common Gardens Across Kansas. *Transactions of*  
1049 *the Kansas Academy of Science* **120**: 1-16.

- 1050 **Matsui A, Ishida J, Morosawa T, Mochizuki Y, Kaminuma**  
1051 **E, et al. 2008.** Arabidopsis Transcriptome Analysis under  
1052 Drought, Cold, High-Salinity and ABA Treatment Conditions  
1053 using a Tiling Array. *Plant Cell Physiol.* **49**(8): 1135-1149.
- 1054 **Maxwell K, Johnson GN. 2000.** Chlorophyll fluorescence-a  
1055 practical guide. *Journal of Experimental Botany*, **51** (345): 659-  
1056 668.
- 1057 **May RL, Warner S, Wingler A. 2017.** Classification of intra-  
1058 specific variation in plant functional strategies reveals  
1059 adaptation to climate. *Annals of Botany* 119: 1343–1352.
- 1060 **McKay JK, Richards JH, Mitchell-Olds T. 2003.** Genetics of  
1061 drought adaptation in *Arabidopsis thaliana*: I. Pleiotropy  
1062 contributes to genetic correlations among ecological traits.  
1063 *Molecular Ecology* **12**: 1137-1151.
- 1064 **Mitchell-Olds T. 2001.** *Arabidopsis thaliana* and its wild  
1065 relatives: a model system for ecology and evolution. *TRENDS*  
1066 *in Ecology & Evolution* Vol.16 No.12.
- 1067 **Mittler R. 2002.** Oxidative stress, antioxidants and stress  
1068 tolerance. *TRENDS in Plant Science* Vol.7 No.9.
- 1069 **Munemasa S, Hauser F, Park J, Waadt R, Brandt B,**  
1070 **Schroeder JI. 2015.** Mechanisms of abscisic acid-mediated  
1071 control of stomatal aperture. *Curr Opin Plant Biol.* **28**: 154–  
1072 162.
- 1073 **Muñoz R, Quiles M J. 2013.** Water Deficit and Heat Affect  
1074 the Tolerance to High Illumination in Hibiscus Plants. *Int. J.*  
1075 *Mol. Sci.* **14**: 5432-5444.
- 1076 **Novikova PY, Hohmann N, Nizhynska V, Tsuchimatsu T,**  
1077 **Jamshaid A, Graham M, Alessia G, Tim P, Karl S, Olga**  
1078 **MF, et al. 2016.** Sequencing of the genus *Arabidopsis*

- 1079 identifies a complex history of nonbifurcating speciation and  
1080 abundant trans-specific polymorphism. *Nature Genetics* 48 (9).
- 1081 **O'Toole JC, Moya TB. 1978.** Genotypic variation in  
1082 maintenance of leaf water potential in rice. *Crop Sci.* **18**: 873-  
1083 876.
- 1084 **Oppenheimer HR. 1960.** Adaptation to drought: Xerophytism.  
1085 Pages 105-138 in *Plant water relationships in arid and semi-*  
1086 *arid conditions.* UNESCO, Paris.
- 1087 **Osakabe Y, Yamaguchi-Shinozaki K, Shinozaki K, Tran**  
1088 **LSP. 2014.** ABA control of plant macro-element membrane  
1089 transport systems in response to water deficit and high salinity.  
1090 *New Phytologist* **202**: 35-49.
- 1091 **Paccard A, Fruleux A, Willi Y. 2014.** Latitudinal trait  
1092 variation and responses to drought in *Arabidopsis lyrata*.  
1093 *Oecologia* **175**:577-587.
- 1094 **Pauwels M, Saumitou-Laprade P, Holl AC, Petit D, Bonnin**  
1095 **I. 2005.** Multiple origin of metallicolous populations of the  
1096 pseudometallophyte *Arabidopsis halleri* (Brassicaceae) in  
1097 central Europe: the cpDNA testimony. *Molecular Ecology* **14**:  
1098 4403-4414.
- 1099 **Price AH, Cairns JE, Horton P, Jones HG, Griffiths H.**  
1100 **2002.** Linking drought-resistance mechanisms to drought  
1101 avoidance in upland rice using a QTL approach: progress and  
1102 new opportunities to integrate stomatal and mesophyll  
1103 responses. *Journal of Experimental Botany* **53**: 989-1004
- 1104 **Reddy AR, Chaitanya KV, Vivekanandan M. 2004.**  
1105 Drought-induced responses of photosynthesis and antioxidant  
1106 metabolism in higher plants. *Journal of plant physiology* **161**:  
1107 1189-1202.

- 1108 **Ross-Ibarra J, Wright SI, Foxe JP, Kawabe A, DeRose-**  
1109 **Wilson L, Gos G, Worth C, Brandon D, Gaut S. 2008.**  
1110 Patterns of Polymorphism and Demographic History in Natural  
1111 Populations of *Arabidopsis lyrata*. *PLOS ONE* 5(8).
- 1112 **Sakuma Y, et al. 2006.** Functional Analysis of an Arabidopsis  
1113 Transcription Factor, DREB2A, Involved in Drought-  
1114 Responsive Gene Expression. *The Plant Cell J.* **18**: 1292–1309.
- 1115 **Schreiber U, Schliwa U, Bilger W. 1986.** Continuous  
1116 recording of photochemical and non-photochemical chlorophyll  
1117 fluorescence quenching with a new type of modulation  
1118 fluorometer. *Photosynthesis Research.* **10**: 51-62.
- 1119 **Seki M, Narusaka M, Abe H, Kasuga M, Yamaguchi-**  
1120 **Shinozaki K, et al. 2001.** Monitoring the expression pattern of  
1121 1300 Arabidopsis genes under drought and cold stresses by  
1122 using a full-length cDNA microarray. *Plant Cell* **13**: 61-7.
- 1123 **Seki M, Narusaka, M, Ishida J, et al. 2002.** Monitor the  
1124 expression profiles of 7000 Arabidopsis genes under drought,  
1125 cold and high-salinity stresses using a full-length cDNA micro-  
1126 array. *Plant J.* **31**: 279-292.
- 1127 **Shinozaki K, Yamaguchi-Shinozaki K. 2007.** Gene networks  
1128 involved in drought stress response and tolerance. *J Exp Bot*  
1129 **58**: 221-7.
- 1130 **Sletvold N, Agren J. 2012.** Variation in tolerance to drought  
1131 among Scandinavian populations of *Arabidopsis lyrata*. *Evol*  
1132 *Ecol* **26**: 559-77.
- 1133 **Sreenivasulu N, Harshavardhan VT, Govind G, Seiler C,**  
1134 **Kohli A. 2012.** Contrapuntal role of ABA: Does it mediate  
1135 stress tolerance or plant growth retardation under long-term  
1136 drought stress? *Gene* **506**: 265–273.

- 1137 **Stebbins GL. 1952.** Aridity as a stimulus to plant evolution.  
1138 *Am Nat.* **86**: 33-44.
- 1139 **Stein Ricardo J, Hoereth S, Romário J, de Melo F,**  
1140 **Syllwasschy L, Gwonjin L, Mário L, Garbin, Clemens S,**  
1141 **Kraemer U. 2017.** Relationships between soil and leaf mineral  
1142 composition are element-specific, environment-dependent and  
1143 geographically structured in the emerging model *Arabidopsis*  
1144 *halleri*. *New phytologist* **213**(3): 1274-1286.
- 1145 **Steven FJ. 2011.** Plasticity and evolution in drought avoidance  
1146 and escape in the annual plant *Brassica rapa*. *New Phytologist*  
1147 **190**: 249–257.
- 1148 **Stolpe C, Krämer U, Müller C. 2016.** Heavy metal hyper-  
1149 accumulation in leaves of *Arabidopsis halleri* is accompanied  
1150 by a reduced performance of herbivores and shifts in leaf  
1151 glucosinolate and element concentrations. *Environmental and*  
1152 *Experimental Botany* **133**: 78-86.
- 1153 **Sugiyama, S.-i. 2006.** Responses of shoot growth and survival  
1154 to water stress gradient in diploid and tetraploid populations of  
1155 *Lolium multiflorum* and *L. perenne*. *Grassland Science* **52**:  
1156 155–160.
- 1157 **Szabados L, Savouré A. 2010.** Proline: a multifunctional  
1158 amino acid. *Trends in Plant Science* **15**: 89–97.
- 1159 **The 1001 Genomes Consortium 2016.** 1135 genomes reveal  
1160 the global pattern of polymorphism in *Arabidopsis thaliana*.  
1161 *Cell* **166**: 481–491.
- 1162 **Tonsor SJ, Alonso-Blanco C, Koornneef M. 2005.** Gene  
1163 function beyond the single trait: natural variation, gene effects,  
1164 and evolutionary ecology in *Arabidopsis thaliana*. *Plant Cell*  
1165 *and Environment* **28**: 2–20.

- 1166 **Urano K, Maruyama K, Jikumaru Y, Kamiya Y,**  
1167 **Yamaguchi-Shinozaki K, Shinozaki K. 2017.** Analysis of  
1168 plant hormone profiles in response to moderate dehydration  
1169 stress. *The Plant Journal* **90**: 17–36.
- 1170 **Verslues PE, Juenger TE. 2011.** Drought, metabolites, and  
1171 Arabidopsis natural variation: a promising combination for  
1172 understanding adaptation to water-limited environments.  
1173 *Current Opinion in Plant Biology* **14**: 240–245.
- 1174 **Wang JZ, et al., 2007.** A new method to measure the semantic  
1175 similarity of GO terms. *Bioinformatics* **23**(10):1274–1281.
- 1176 **Wehmeyer N, Vierling E. 2000.** The expression of small heat  
1177 shock proteins in seeds responds to discrete developmental  
1178 signals and suggests a general protective role in desiccation  
1179 tolerance. *Plant Physiol.* **122**: 1099–1108.
- 1180 **Wickham H, 2009.** ggplot2: elegant graphics for data analysis.  
1181 *New York: Springer-Verlag.*
- 1182 **Willems G, Dräger DB, Courbot M, Godé C, Verbruggen**  
1183 **N, Saumitou-Laprade P. 2007.** The Genetic Basis of Zinc  
1184 Tolerance in the Metallophyte *Arabidopsis halleri* ssp. *halleri*  
1185 (Brassicaceae): An Analysis of Quantitative Trait Loci.  
1186 *Genetics* **176**: 659–674.
- 1187 **Wu CA, Lowry DB, Nutter LI, Willis JH. 2010.** Natural  
1188 variation for drought response traits in the *Mimulus guttatus*  
1189 species complex. *Oecologia* **162**(1): 23–33.
- 1190 **Yoshida Y, et al. 1999.** Stress-responsive and developmental  
1191 regulation of Delta (1)-pyrroline-5-carboxylate synthetase 1  
1192 (P5CS1) gene expression in *Arabidopsis thaliana*. *Biochem*  
1193 *Biophys Res Commun* **261**(3):766-772.
- 1194 **Yoshida T, Mogami J, Yamaguchi-Shinozaki K. 2014.**  
1195 ABA-dependent and ABA independent signaling in response to



1196 osmotic stress in plants. *Current Opinion in Plant Biology*  
1197 **21**:1–7.

1198 **Yu G. 2010.** GOSemSim: an R package for measuring  
1199 semantic similarity among GO terms and gene products.  
1200 *Bioinformatics* **26**(7):976–978.

1201 **Yue B, Xue W, Xiong L, Yu X, Luo L, et al. 2006.** Genetic  
1202 basis of drought resistance at reproductive stage in rice:  
1203 separation of drought tolerance from drought avoidance.  
1204 *Genetics* **172**: 121-328.

## 1205 **Supporting Information**

1206 **Figure S1:** Summary of short read mapping to the *A. lyrata*  
1207 reference genome V1 (Hu et al., 2011).

1208 **Figure S2:** Wilting day and soil moisture at wilting for the two  
1209 first biological experiments of the drying-down experiments.

1210 **Figure S3:** Soil water content during the first 7 days after water  
1211 withdrawal.

1212 **Figure S4:** Initial rosette area and leaf thickness of the plants  
1213 used in the second biological experiments of the drying-down  
1214 experiment.

1215 **Figure S5:** Photosynthesis efficiency at wilting.

1216 **Figure S6:** Proportion of surviving *A. halleri*, *A. lyrata*, and *A.*  
1217 *thaliana* plants 2 days after re-watering for the two first  
1218 biological experiments.

1219 **Table S1:** List of accessions used for the dry-down  
1220 experiments.

1221 **Table S2:** Phenotypes measured in the three drying-down  
1222 experiments.

1223 **Table S3:** Number of accessions used in the three drying-down  
1224 experiments.

1225 **Table S4:** Summary statistics of the multiple comparison of the  
1226 wilting day between species.

1227 **Table S5:** Summary statistics of the multiple comparison of the  
1228 soil moisture at wilting between species.

1229 **Table S6:** Summary statistics of the multiple comparison of the  
1230 initial rosette area between species.

1231 **Table S7:** Summary statistics of the multiple comparison of the  
1232 initial leaf thickness between species.

1233 **Table S8:** Summary statistics of the multiple comparison of the  
1234 relative leaf water loss 7 days before wilting between species.

1235 **Table S9:** Summary statistics of glm testing the effect of  
1236 interaction between species and desiccation rate on the relative  
1237 loss of leaf water content before wilting.

1238 **Table S10:** Summary statistics of the multiple comparison of  
1239 the photosynthetic efficiency at wilting between species.

1240 **Table S11:** Summary statistics of the multiple comparison of  
1241 the survival rate 2 days after re-watering between species.

1242 **Table S12:** Differentially expressed genes identified for each  
1243 of *Arabidopsis halleri* and *A. lyrata* between 20 and 60% of  
1244 soil moisture and between recovery and 60% of soil moisture.

## 1245 **Figures**

1246 **Figure 1:** Stomata density and  $\delta^{13}\text{C}$  measured in *Arabidopsis*  
1247 *halleri* and *A. lyrata* grown under well-watered conditions. (a)  
1248 Abaxial stomatal density. (b)  $\delta^{13}\text{C}$  measured for the same  
1249 plants. Violin plots with the same letter are not significantly  
1250 different according to Tukey's HSD (P value <0.05).

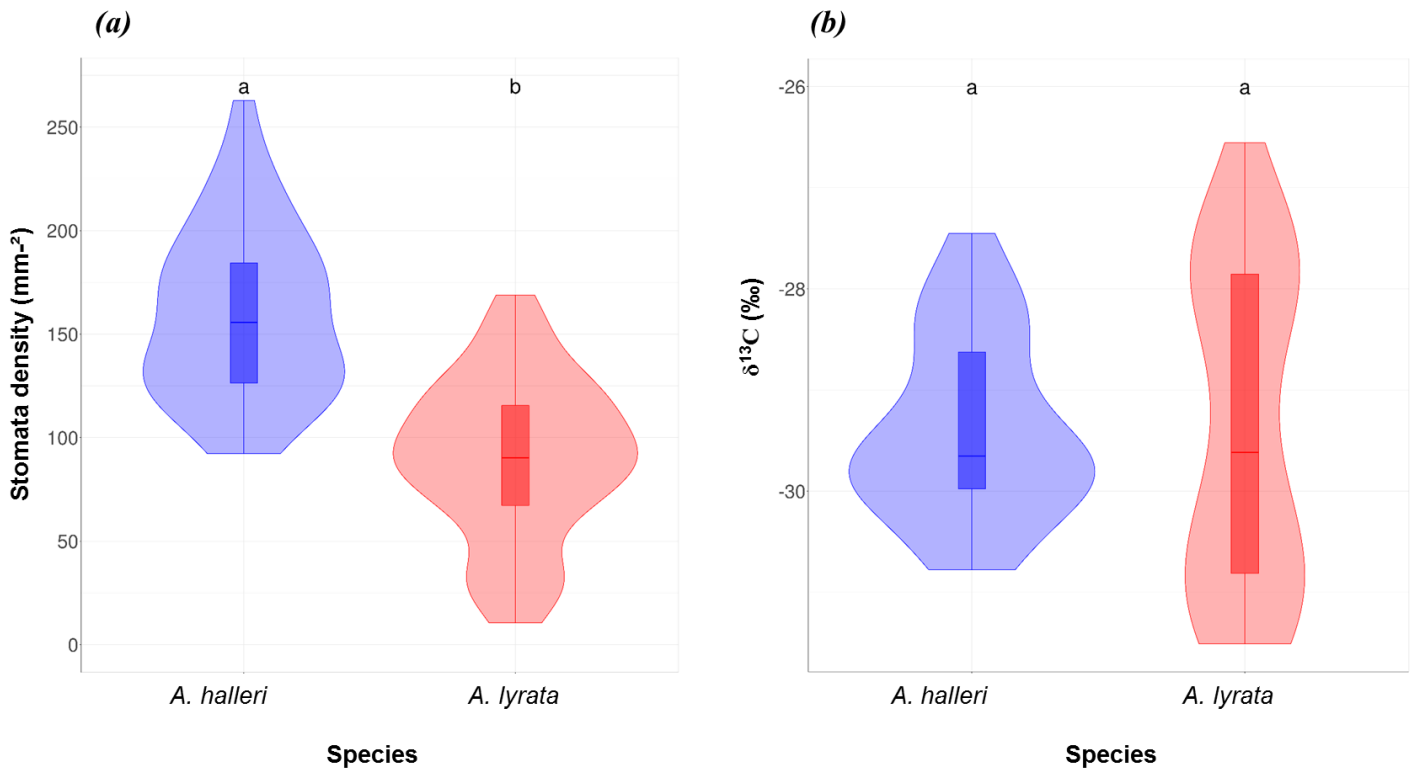

1251

1252 **Figure2:** Typical phenotypes of wilting observed in  
1253 *Arabidopsis halleri*, *A. lyrata*, and *A. thaliana*. Plant  
1254 morphology before the water withdrawal treatment (top row)  
1255 and at wilting (bottom row) for *A. halleri* (a, d), *A. lyrata* (b, e)  
1256 and *A. thaliana* (c, f). All plants were grown in 7cm pots.

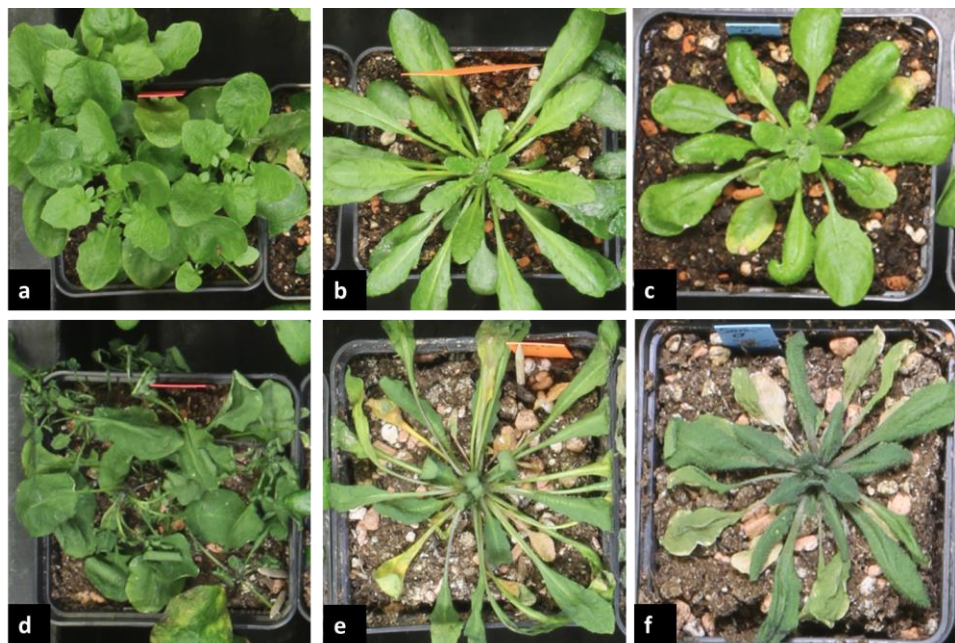

1257

1258 **Figure 3:** Wilting day and soil moisture at wilting for  
1259 *Arabidopsis halleri*, *A. lyrata*, and *A. thaliana*. (a) Number of  
1260 days between initiation of soil dry-down treatment and wilting.  
1261 (b) Soil moisture at wilting. Letters above violin plots indicate  
1262 significant differences between species (*Tukey's HSD test*, *P*  
1263 *value* <0.05). Results are shown for the first biological  
1264 experiment.

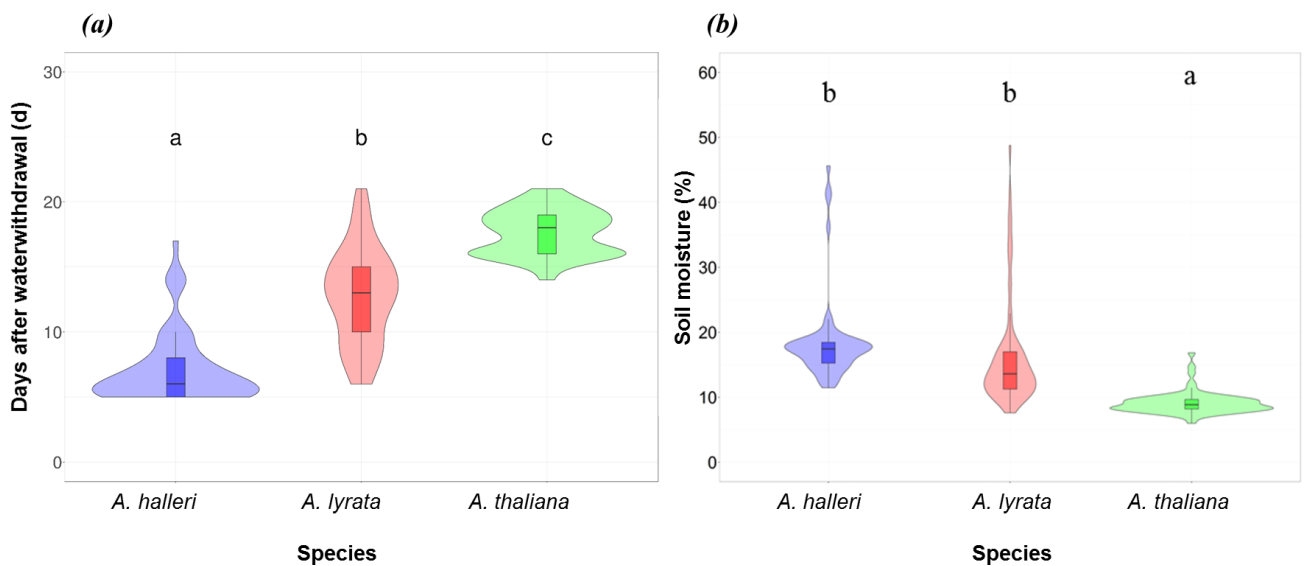

1265

1266 **Figure 4:** Correlations between desiccation rate and initial leaf  
1267 size and desiccation rate and the relative leaf water loss. (a)  
1268 Correlation between the initial rosette leaf area (at 60% of soil  
1269 moisture) and the percentage of soil desiccation rate (Pearson  
1270 correlation coefficients and p values for: *Arabidopsis thaliana*  
1271 ( $r = 0.32$ , *P* value = 0.013); *A. lyrata* ( $r = 0.14$ , *P* value = 0.22)  
1272 and *A. halleri* ( $r = 0.48$ , *P* value = 0.00072). (b) Correlation  
1273 between the relative water loss in leaves before wilting  
1274 (equivalent to the ratio of leaf thickness day 2 : day 7 before  
1275 wilting) and the desiccation rate (Pearson correlation  
1276 coefficients and p values for: *A. thaliana* ( $r = 0.018$ , *P* value =  
1277 0.732); *A. lyrata* ( $r = 0.023$ , *P* value = 0.692) and *A. halleri* ( $r =$   
1278 0.39, *P* value =  $4.282 \cdot 10^{-08}$ ). Results are shown for the second  
1279 biological experiment. Lines represent a linear regression

1280 smoothing where the shaded ribbons represent the standard  
1281 error.

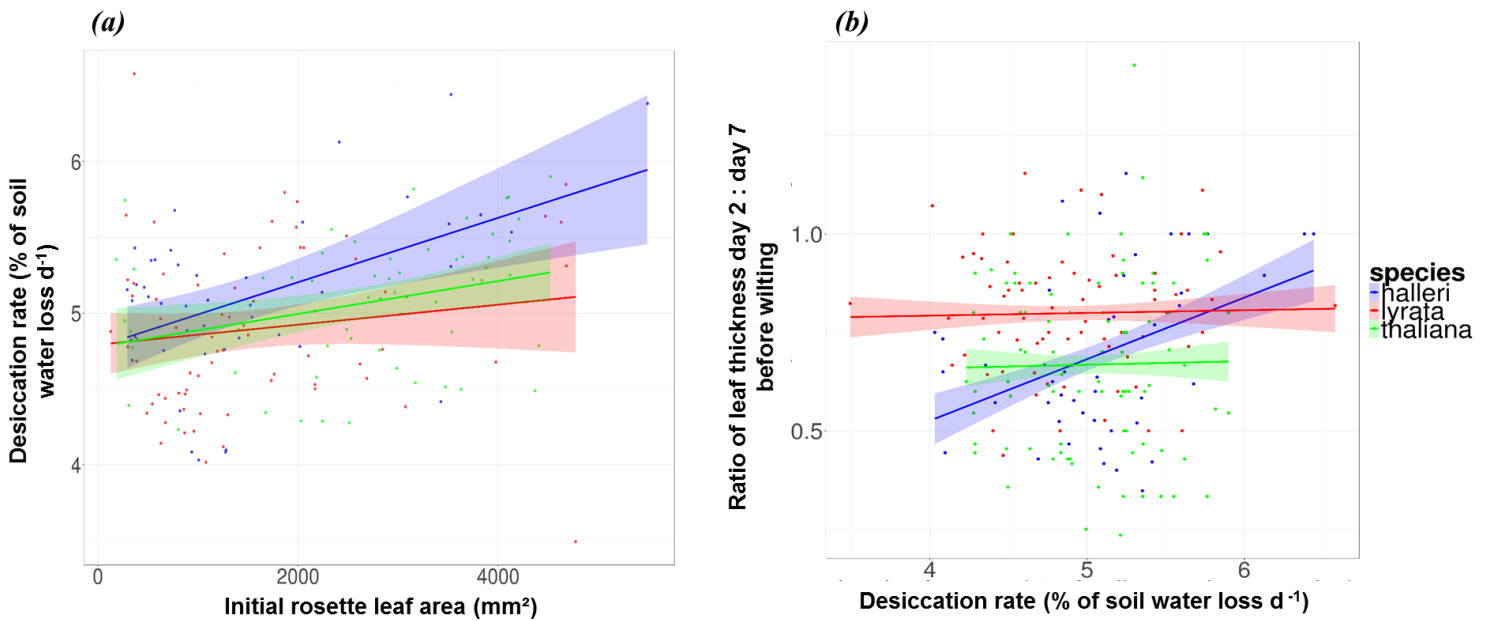

1282

1283 **Figure 5:** Leaf thickness in response to decrease of soil  
1284 moisture for *Arabidopsis thaliana*, *A. halleri*, and *A. lyrata*.  
1285 Results were collected in the second biological experiment.  
1286 Shaded ribbons represent the standard deviation. Filled  
1287 triangles correspond to the average wilting soil moisture for the  
1288 different species.

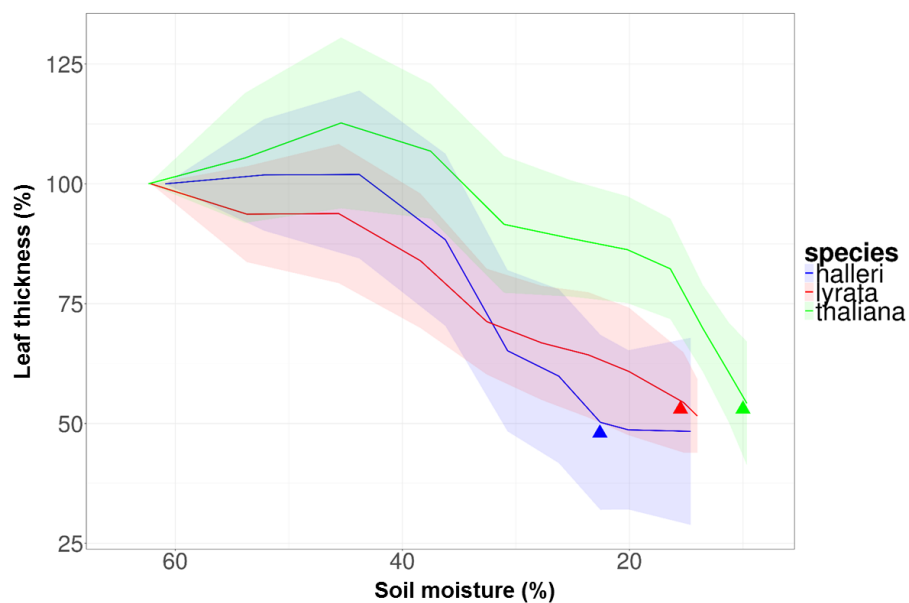

1289

1290 **Figure 6:** Relative leaf water loss seven days before wilting in  
1291 *Arabidopsis halleri*, *A. lyrata*, and *A. thaliana*. This is  
1292 equivalent to the ratio of leaf thickness at day two vs day seven  
1293 before wilting. Boxplots with the same letter are not  
1294 significantly different (*Tukey's HSD*, *P value* <0.05). Results  
1295 are shown for the second biological experiment.

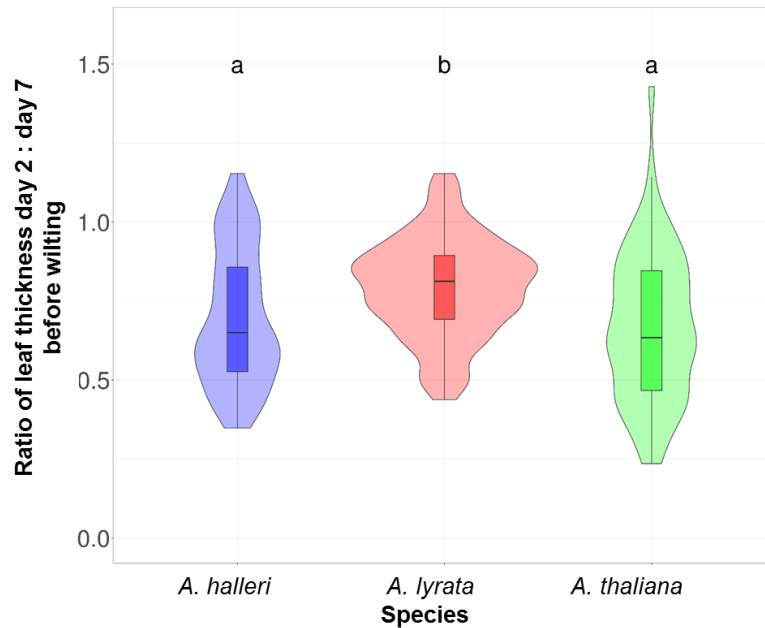

1296

1297

1298

1299

1300

1301

1302

1303

1304

1305

1306

1307 **Figure 7:** Average survival rate after re-watering following two  
1308 to six days of wilting for *Arabidopsis halleri*, *A. lyrata*, and *A.*  
1309 *thaliana*. Results are shown for the first biological replicate.  
1310 Barplots with one star or more are significantly different  
1311 (Tukey's HSD, Signif. codes: ,  $P < 0.1$  ; \* ,  $P < 0.05$ ; \*\* ,  $P <$   
1312  $0.01$ ; \*\*\* ,  $P < 0.001$ ; ns, not significant).

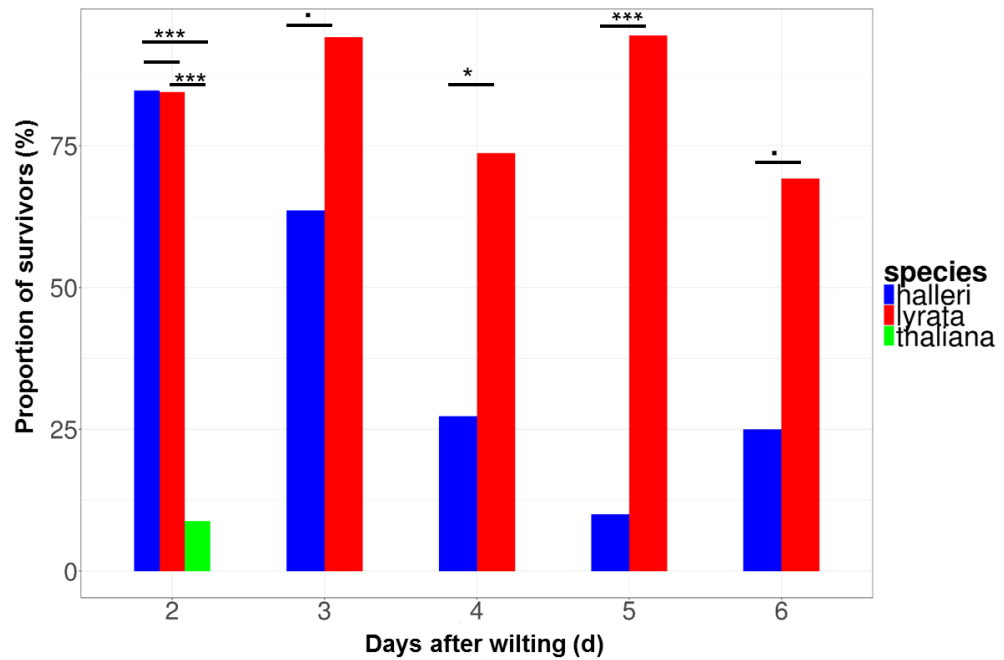

1313

1314

1315

1316

1317

1318

1319

1320

1321

1322

1323

1324 **Figure 8:** Damage scored on survivors to two days of wilting  
1325 after resuming growth for *Arabidopsis halleri*, *A. lyrata*, and *A.*  
1326 *thaliana*. . Results are shown for the second biological  
1327 experiment. Barplots with one star or more are significantly  
1328 different (*Tukey's HSD*, *Signif. codes*: ;  $P < 0.1$  ; \* ,  $P < 0.05$ ;  
1329 \*\*,  $P < 0.01$ ; \*\*\*,  $P < 0.001$ ; *ns*, not significant).

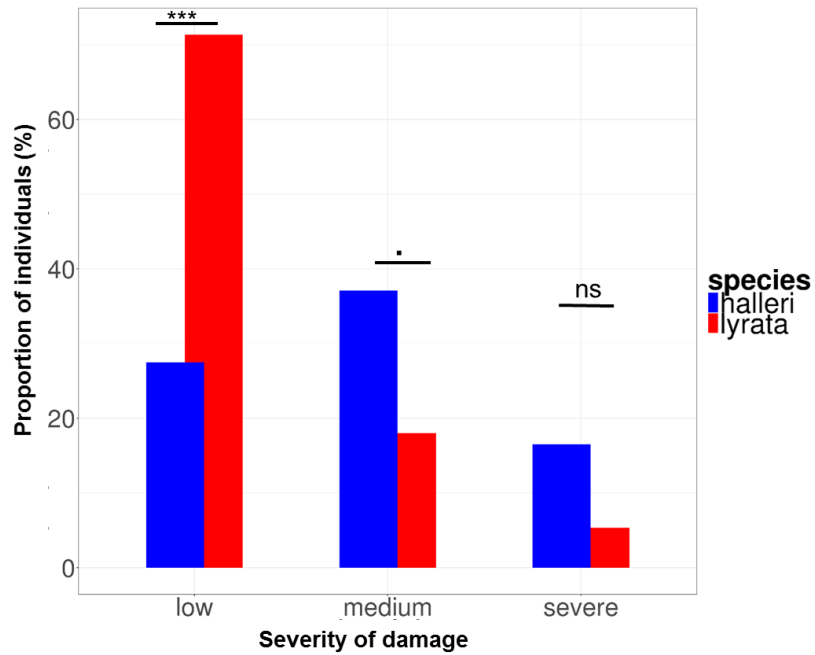

1330
